1 **Parallel use of pluripotent human stem cell lung and heart models provide new**  
2 **insights for treatment of SARS-CoV-2**

3  
4  
5 Rajeev Rudraraju<sup>1\*</sup>, Matthew J Gartner<sup>1\*</sup>, Jessica A. Neil<sup>1\*</sup>, Elizabeth S. Stout<sup>2\*</sup>, Joseph  
6 Chen<sup>3-5\*</sup>, Elise J. Needham<sup>6\*</sup>, Michael See<sup>2,7\*</sup>, Charley Mackenzie-Kludas<sup>1</sup>, Leo Yi Yang  
7 Lee<sup>1</sup>, Mingyang Wang<sup>1</sup>, Hayley Pointer<sup>2</sup>, Kathy Karavendzas<sup>2</sup>, Dad Abu-Bonsrah<sup>2</sup>,  
8 Damien Drew<sup>8</sup>, Yu Bo Yang Sun<sup>3-5</sup>, Jia Ping Tan<sup>3-5</sup>, Guizhi Sun<sup>3-5</sup>, Abbas Salavaty<sup>5,9</sup>,  
9 Natalie Charitakis<sup>2,13</sup>, Hieu T. Nim<sup>2,5,13</sup>, Peter D Currie<sup>5,9</sup>, Wai-Hong Tham<sup>8,10</sup>, Enzo  
10 Porrello<sup>2,11,12,+ψ</sup>, Jose Polo<sup>3,+ψ</sup>, Sean J. Humphrey<sup>6,+ψ</sup>, Mirana Ramialison<sup>2,5,13,+ψ</sup>, David  
11 A. Elliott<sup>2,5,13,+ψ</sup>, Kanta Subbarao<sup>1,14,+ψ</sup>

12  
13 <sup>1</sup>The Department of Microbiology and Immunology, The Peter Doherty Institute for  
14 Infection and Immunity, The University of Melbourne, Melbourne, 3000, Victoria,  
15 Australia.

16 <sup>2</sup>The Novo Nordisk Foundation Centre for Stem Cell Medicine (reNEW), Murdoch  
17 Children's Research Institute, Melbourne, 3052, Victoria, Australia.

18 <sup>3</sup>Department of Anatomy and Developmental Biology, Monash University, Clayton,  
19 Victoria, Australia.

20 <sup>4</sup>Development and Stem Cells Program, Monash Biomedicine Discovery Institute,  
21 Clayton, Victoria, Australia.

22 <sup>5</sup>Australian Regenerative Medicine Institute, Monash University, Clayton, Victoria,  
23 Australia.

24 <sup>6</sup>Charles Perkins Centre and School of Life and Environmental Sciences, Faculty of  
25 Science, The University of Sydney, Camperdown, NSW 2006 Australia.

26 <sup>7</sup> Monash Bioinformatics Platform, Monash University, Clayton, VIC 3800, Australia.

27 <sup>8</sup>Infection and Immunity Division, The Walter and Eliza Hall Institute of Medical Research,  
28 Victoria, Australia.

29 <sup>9</sup> EMBL Australia, Monash University, Clayton, VIC 3800, Australia.

30 <sup>10</sup>Department of Medical Biology, The University of Melbourne, Melbourne, VIC 3010,  
31 Australia.

32 <sup>11</sup>Melbourne Centre for Cardiovascular Genomics and Regenerative Medicine, The Royal  
33 Children's Hospital, Melbourne 3052, VIC, Australia.

34 <sup>12</sup>Department of Anatomy and Physiology, School of Biomedical Sciences, The University  
35 of Melbourne, Parkville, Australia.

36 <sup>13</sup>Department of Pediatrics, The Royal Children's Hospital, University of Melbourne  
37 Parkville, Victoria, 3052, Australia.

38 <sup>14</sup>The WHO Collaborating Centre for Reference and Research on Influenza, The Peter  
39 Doherty Institute for Infection and Immunity, Melbourne 3000, Victoria, Australia.

40 \*These authors contributed equally.

41 †, ‡ Co-senior and co-corresponding authors.

42  
43 The WHO Collaborating Centre for Reference and Research on Influenza, The Peter  
44 Doherty Institute for Infection and Immunity, Melbourne 3000, Victoria, Australia; The  
45 Department of Microbiology and Immunology, The Peter Doherty Institute for Infection  
46 and Immunity, The University of Melbourne, Melbourne, 3000, Victoria, Australia.

47 Contact: [kanta.subbarao@influenzacentre.org](mailto:kanta.subbarao@influenzacentre.org)

48

49 **Keywords:** SARS-CoV-2; COVID-19; human stem cell derived lung and heart models;

50 antiviral drugs

51 **One-sentence summary:** Rational treatment strategies for SARS-CoV-2 derived from

52 human PSC models

53

54 **Abstract**

55

56 SARS-CoV-2 primarily infects the respiratory tract, but pulmonary and cardiac  
57 complications occur in severe COVID-19. To elucidate molecular mechanisms in the lung  
58 and heart, we conducted paired experiments in human stem cell-derived lung alveolar  
59 type II (AT2) epithelial cell and cardiac cultures infected with SARS-CoV-2. With CRISPR-  
60 Cas9 mediated knock-out of ACE2, we demonstrated that angiotensin converting enzyme  
61 2 (ACE2) was essential for SARS-CoV-2 infection of both cell types but further processing  
62 in lung cells required TMPRSS2 while cardiac cells required the endosomal pathway.  
63 Host responses were significantly different; transcriptome profiling and  
64 phosphoproteomics responses depended strongly on the cell type. We identified several  
65 antiviral compounds with distinct antiviral and toxicity profiles in lung AT2 and cardiac  
66 cells, highlighting the importance of using several relevant cell types for evaluation of  
67 antiviral drugs. Our data provide new insights into rational drug combinations for effective  
68 treatment of a virus that affects multiple organ systems.

69



## 70 **Introduction**

71           Coronavirus disease 19 (COVID-19) is primarily a respiratory disease. About 80%  
72 of infections are clinically mild or asymptomatic. Progression to severe illness is  
73 associated with lower respiratory tract involvement with pneumonia and acute respiratory  
74 distress syndrome (1, 2). Pulmonary fibrosis has been reported in survivors of COVID-19  
75 (3).

76           In addition to pulmonary disease, cardiovascular, renal, digestive and neurological  
77 complications are reported (4). Cardiac complications include arrhythmias,  
78 thromboembolism, acute myocardial injury associated with elevated levels of cardiac  
79 troponin and electrocardiographic abnormalities (5, 6). Magnetic resonance imaging has  
80 shown cardiac involvement in up to 78% of recovered COVID-19 patients, and ongoing  
81 myocardial inflammation in 60% of patients (7, 8). Moreover, a meta-analysis of studies  
82 in COVID-19 patients found that myocardial injury was significantly associated with  
83 increased mortality (9). While cardiac damage during COVID-19 is predominantly thought  
84 to be due to an over-exuberant immune response, studies of autopsy tissue from patients  
85 who died from COVID-19 have detected viral RNA and Spike (S) antigen in the heart (10-  
86 12).

87           SARS-CoV-2 mediates infection by binding of the S protein to its receptor,  
88 angiotensin converting enzyme 2 (ACE2) on the host cell (13). The S protein is cleaved  
89 into two domains, S1 and S2 by host cell proteases, including furin (14). Following  
90 attachment, fusion with the cell membrane requires further proteolytic cleavage at the S2'  
91 site to activate the fusion peptide (15). This is mediated extracellularly by serine proteases

92 including Transmembrane protease, serine 2 (TMPRSS2) or in endosomes by Cathepsin  
93 L (15-17). Thus, ACE2 is a critical determinant of the tissue tropism of SARS-CoV-2, as  
94 are the presence of proteases and/or endosomal pathways for activation of the fusion  
95 activity of the S protein. ACE2 is expressed in many human tissues including the lungs,  
96 nose, cornea, heart, kidney, esophagus, gastrointestinal tract, liver, gallbladder placenta  
97 and testis, with high ACE2 expression observed in the nasal epithelium, lungs, ileum and  
98 heart (18-23). Tissue sites containing cells that co-express ACE2 and TMPRSS2 include  
99 the nose, lungs, kidney, gastrointestinal tract and the gallbladder (18, 22), while cells co-  
100 expressing ACE2 and Cathepsin L are found within the lung, heart and the  
101 gastrointestinal tract (22). Following entry, the virus interacts with the cellular machinery  
102 to complete its replication cycle and triggers a host cell response that can vary in different  
103 organs.

104 We sought to elucidate the molecular mechanisms of SARS-CoV-2 infection in  
105 lung and heart using human stem cell-derived lung and cardiac cells. Human pluripotent  
106 stem cells (hPSCs) including both human embryonic stem cells (hESCs) and induced  
107 pluripotent stem cells (hiPSCs) have been used to generate functional human cells, tissue  
108 and organoids to model human disease. We and others have generated stem cell-derived  
109 lung alveolar type II (AT2) epithelial cell and cardiac cultures that can be productively  
110 infected with SARS-CoV-2 (17, 24-26). We hypothesized that paired experiments in  
111 SARS-CoV-2 infected lung and cardiac cells would reveal important similarities and  
112 differences in viral and host factors that could inform treatment of COVID-19 and its  
113 complications. We used CRISPR-Cas9 mediated knock-out of ACE2 and demonstrated  
114 that ACE2 was essential for SARS-CoV-2 infection of both cell types. Small molecule

115 inhibitors revealed distinct mechanisms of SARS-CoV-2 entry. We identified differential  
116 cellular responses to SARS-CoV-2 infection by transcriptome profiling and  
117 phosphoproteomics and further demonstrated the utility of these stem cell-derived models  
118 for screening antiviral compounds for anti-SARS-CoV-2 activity. Our findings provide new  
119 insights into treatment strategies for COVID-19.

## 120 **Results**

### 121 **SARS-CoV-2 productively infects human stem cell-derived lung AT2 and cardiac** 122 **cultures**

123 hESC and iPSC-derived cardiomyocyte (27, 28) and AT2 lung (29) cultures were  
124 generated to develop *in vitro* models of SARS-CoV-2 infection (Figure 1A). Lung AT2  
125 cultures expressed high levels of lung development homeobox protein NKX2-1 and low  
126 levels of the type I alveolar cell marker Aquaporin-5 (AQP5) confirming the presence of  
127 low numbers of alveolar type I cells (Figure S1A). Gene expression profiling of the lung  
128 AT2 and cardiac cells demonstrated transcriptional profiles consistent with high levels of  
129 AT2 cells and cardiomyocytes, respectively (Figure S1B, C). For example, key cardiac  
130 genes such as those encoding myofilament proteins (*TNNT2*, *MYH7*, *MYL2* and *TTN*)  
131 and cardiomyocyte transcription factors (*HAND2*, *MEF2C* and *NKX2-5*) were expressed  
132 in cardiac cultures whilst the lung AT2 cultures expressed lung-specific development  
133 markers (*NKX2-1*, *SOX9* and *GATA6*) and signaling genes (*SHH* and *BMP4*).

134 To determine susceptibility to SARS-CoV-2 infection, lung AT2 and cardiac cells  
135 were inoculated with the ancestral strain of SARS-CoV-2. Vero cells were included in the  
136 experiment as a positive control for virus infection. As expected, SARS-CoV-2

137 productively infected Vero cells with virus titres and E gene copies, determined by  
138 infectivity assay and qPCR respectively, peaking at 3 days post-infection (dpi) (Figure  
139 1B). SARS-CoV-2 showed robust virus replication in lung AT2 cells, with virus titres and  
140 E gene copies, peaking at 4 dpi (Figure 1B). Immunostaining for double stranded RNA  
141 (dsRNA) showed evidence of SARS-CoV-2 replication at 3 dpi (Figure 1C). Cardiac cell  
142 cultures differentiated from hESCs (*NKX2-5<sup>eGPF/w</sup>* (30)) were also susceptible to SARS-  
143 CoV-2 infection with virus titres and E gene copies peaking slightly later than AT2 cells  
144 between 4 and 6 dpi (Figure 1B). Cardiac cells generated from *ALPK3* knockout hESCs  
145 that model hypertrophic cardiomyopathy (31), were similarly susceptible to SARS-CoV-2  
146 infection with a peak in virus titres at 4 dpi (Figure S1D). Immunostaining showed SARS-  
147 CoV-2 dsRNA in both cardiomyocyte and non-cardiomyocyte cells within the cardiac  
148 monolayer cultures (Figure 1C). Furthermore, cardiac cultures infected with SARS-CoV-  
149 2 stopped contracting at 4 dpi (Video S1). Overall, these data show that SARS-CoV-2  
150 replicates efficiently in cardiac and lung AT2 cells derived *in vitro* from hPSCs, consistent  
151 with published reports (17, 24).

152 To determine whether cardiac and lung AT2 cells are susceptible to infection by  
153 SARS-CoV-2 variants, virus titres and E gene copies were assessed following infection  
154 with Alpha, Beta, Gamma, Delta and Omicron (BA.1 and BA.2) variants. Although all  
155 variants were able to infect the lung AT2 cells, a modest difference was observed  
156 following Delta infection in lung AT2 cells at 1 and 3 dpi (Figure 1D, S1E) but titres were  
157 comparable to all other variants by 5 dpi. In cardiac cells, a slightly lower virus titer was  
158 observed following infection with the Alpha variant at 3 dpi (Figure 1D). However, this was  
159 not observed for E gene copies where WT levels were higher than other variants on 1

160 and 3 dpi (Figure S1E). In lung AT2 cells, the Omicron subvariants showed similar titres  
161 to the WT virus, although BA.1 showed a modest reduction in virus titres and E gene  
162 copies compared to BA.2 (Figure 1E, S1F). In cardiac cells, the BA.1 and BA.2 variants  
163 showed significantly lower virus titres compared to the WT virus at 2-5dpi (Figure 1E).  
164 However, this difference in replication was not observed for E gene copies (Figure S1F).  
165 These data confirm that hPSCs derived *in vitro* models can be used to study all variants  
166 and that SARS-CoV-2 variants infect cardiac and lung cells efficiently.

### 167 **SARS-CoV-2 infection in lung AT2 and cardiac cells is dependent on ACE2**

168 ACE2 is the functional receptor for sarbecoviruses, the SARS coronavirus family.  
169 To confirm that ACE2 is required for SARS-CoV-2 infection in cardiac and lung AT2 cells,  
170 we generated two *ACE2* knockout (KO) hPSC lines (H9 and MCRIi010-A) engineered via  
171 CRISPR/Cas9 to remove the first coding exon of *ACE2* (Figure S2A and B). *ACE2* protein  
172 and *ACE2* transcript expression was not detected in either lung AT2 or cardiac cultures  
173 differentiated from the *ACE2* knockout line (Figure S2C and D). Flow cytometric analysis  
174 confirmed that the genetically modified cells maintained their expression of pluripotency  
175 markers and showed similar differentiation capacity (Figure S2E and F). Furthermore,  
176 immunofluorescence staining in *ACE2* KO cardiac or lung AT2 cells showed that *ACE2*  
177 expression was undetectable (Figure S2H).

178 Following confirmation that *ACE2* was knocked out in H9 and MCRIi010-A lines,  
179 cardiomyocyte and AT2 differentiation protocols were performed. The *ACE2* KO cardiac  
180 or lung AT2 cells could not be productively infected with SARS-CoV-2, as shown by the  
181 inability to recover infectious virus and absence of dsRNA staining (Figure 2A, S2G-

182 S2H). For independent confirmation of the role of ACE2, we used a combination of two  
183 previously described  $\alpha$ -ACE2 antibodies at doses between 2-40  $\mu$ g/mL (23). In cardiac  
184 cultures, 2  $\mu$ g/mL of  $\alpha$ -ACE2 antibodies was sufficient to completely block SARS-CoV-2  
185 infection (Figure 2B). In contrast, treatment with the  $\alpha$ -ACE2 antibody cocktail blocked  
186 infection in a concentration-dependent fashion in lung AT2 cells (Figure 2B). Overall, our  
187 data demonstrate that SARS-CoV-2 infection in lung AT2 and cardiac cells is dependent  
188 on ACE2 for virus entry.

### 189 **SARS-CoV-2 utilizes differential entry mechanisms in lung AT2 and cardiac cells**

190 Following attachment to the host cell receptor, coronaviruses require proteolytic  
191 activation of the spike protein to mediate fusion of the viral and host cell membranes.  
192 SARS-CoV-2 can be activated for fusion at the cell membrane through transmembrane  
193 protease, serine 2 (TMPRSS2) mediated cleavage of the (S2') site or through  
194 endocytosis, where endosomal acidification triggers Cathepsin L (CSTL)-activated fusion  
195 between the viral and endolysosomal membranes. While lung AT2 cells had high  
196 expression of *TMPRSS2*, cardiac cells did not express *TMPRSS2* (Figure S3A, B). In  
197 contrast, both lung AT2 and cardiac cells expressed *CSTL* at high levels (Figure S3A, B)  
198 suggesting that SARS-CoV-2 may enter cardiac cells via the endocytosis pathway.

199 To determine the mechanism of entry, cells were infected in the presence of the  
200 *TMPRSS2* inhibitor Camostat mesylate or the Cathepsin B/L inhibitor CA-074 Me.  
201 Camostat treatment (100, 10 and 1  $\mu$ M) led to a significant reduction in virus titer and  
202 genome copies in lung AT2 but not in cardiac cells (Figure 2C and S3C) showing that  
203 infection in lung AT2 cells requires *TMPRSS2* cleavage. In contrast, 25  $\mu$ M of CA-074 Me

204 led to a significant reduction in virus titer and genome copies in cardiac but not in lung  
205 AT2 cells (Figure 2C and S3C), confirming that the viral entry in cardiac cells requires the  
206 endosomal pathway. Thus, consistent with the gene expression data, SARS-CoV-2  
207 utilizes distinct entry pathways in lung AT2 and cardiac cells.

## 208 **Antiviral compounds show differential activity in lung and cardiac cells compared** 209 **to traditional cell lines**

210 To determine whether SARS-CoV-2 antiviral drugs show similar activity in lung  
211 AT2 and cardiac cells, we investigated two sets of small molecules: (a) drugs that are  
212 approved for treatment of COVID-19 including Remdesivir and NHC ( $\beta$ -D-N4-  
213 hydroxycytidine), the prodrug of Molnupiravir and (b) drugs that were reported to show  
214 antiviral activity *in vitro* but are still under clinical investigation or were not found to be  
215 effective in clinical trials including favipiravir, tizoxanide (the active form of the  
216 antiparasitic agent nitazoxanide), and chloroquine.

217 Remdesivir and NHC significantly inhibited viral replication in both cardiac and lung  
218 AT2 cells (Figure 2D, E). In Vero cells, remdesivir inhibited virus replication at a  
219 concentration of 10  $\mu$ M while in lung AT2 cells, the drug completely inhibited virus  
220 replication at concentrations as low as 2.5  $\mu$ M ( $IC_{50}$  = 0.55  $\mu$ M) and antiviral activity in  
221 cardiac cells was far more potent, with complete inhibition of viral replication at 0.08  $\mu$ M  
222 ( $IC_{50}$ =0.016  $\mu$ M) (Figure 2D). Similarly, NHC was more effective in inhibiting virus  
223 replication in cardiac cells compared to lung AT2 and Vero cells, with complete virus  
224 inhibition observed at concentrations as low as 5  $\mu$ M ( $IC_{50}$ =0.42  $\mu$ M) (Figure 2E) while  
225 viral replication was inhibited in Vero and lung AT2 cells with similar dose-response

226 kinetics ( $IC_{50}$ =2.4  $\mu$ M and 3.54  $\mu$ M, respectively) (Figure 2E). In terms of toxicity, reduced  
227 viability of both lung AT2 and cardiac cells was observed with remdesivir concentrations  
228 above 5  $\mu$ M but not in Vero cells (Figure S4A). NHC was noticeably less toxic than  
229 remdesivir in all three cell types, with toxicity observed at the concentration of 40  $\mu$ M in  
230 cardiac and lung AT2 cells (Figure S4B). These results highlight the variability in both  
231 antiviral efficacy and cytotoxicity in different cell types and emphasize the relevance of  
232 using human stem-cell derived models or human cells over Vero cells for assessment of  
233 antiviral drugs for COVID-19.

234 Favipiravir, piperazine and tizoxanide showed no antiviral activity against SARS-  
235 CoV-2 in cardiac, lung AT2 and Vero cells up to a concentration of 10  $\mu$ M (Figure S4C).  
236 Of these three compounds, tizoxanide was toxic in Vero cells but not in cardiac or lung  
237 AT2 cells (Figure S4C). Chloroquine was not toxic in any of the cell types and inhibited  
238 SARS-CoV-2 virus replication in cardiac cells (at 10  $\mu$ M) but not in lung AT2 or Vero cells  
239 (Figure S4C), consistent with our observation that SARS-CoV-2 entry in cardiac cells  
240 utilizes the endosomal pathway. Chloroquine also inhibited virus replication in the *ALPK3*  
241 KO cardiomyopathy model (Figure S4C). Together, these data indicate that the activity of  
242 antiviral drugs differs between lung AT2 and cardiac cells compared to conventionally  
243 used Vero cells.

## 244 **SARS-CoV-2 induces different transcriptional responses in lung AT2 and cardiac** 245 **cells**

246 Based on our observation of distinct entry pathways and antiviral activity between  
247 lung AT2 and cardiac cells, we hypothesized that they would show diverse responses to  
248 SARS-CoV-2 infection. RNA-sequencing (RNA-seq) was performed on cell lysates from



249 hESC-derived lung AT2 and cardiac cells infected with SARS-CoV-2 at 1 and 3 dpi. A  
250 principal component analysis (PCA) plot separated the tissue types and demonstrated a  
251 progressive separation between mock-infected and virus-infected cells particularly by 3  
252 dpi (Figure 3A). At 1 dpi, no differentially expressed genes (DEGs) were observed in lung  
253 AT2 cells, and only 5 in cardiac cells (data not shown). However, at 3 dpi, 1154 and 992  
254 DEGs were obtained for cardiac and lung AT2 cells, respectively, with specific lung and  
255 cardiac specific DEGs. As shown in Figure 3B, of the DEGs between the 2 cell-types, 202  
256 were overlapping (intersect), 952 genes were differentially expressed in the cardiac cells  
257 only (cardiac unique) and 790 genes were differentially expressed in the lung AT2 cells  
258 only (lung unique). Additionally, we found that SARS-CoV-2 infection did not change the  
259 expression profile of lung development genes in lung AT2 cells and cardiac development  
260 genes in cardiac cells at 1 and 3 dpi (Figure S1B and C).

261 WikiPathway enrichment analysis of DEG subsets identified that the biological  
262 processes impacted by SARS-CoV-2 infection in both lung AT2 and cardiac cells (i.e.  
263 intersect subset), included Electron Transport Chain (OXPHOS system in mitochondria)  
264 (WP111), Host-pathogen interaction of human coronaviruses – Interferon (IFN) induction  
265 (WP4880) and Type I and II IFN signaling pathways (Figure 3C; Figure S5A, B). However,  
266 only 3 genes in the “Intersect” subset involved Type II IFN signaling, indicating only a  
267 relatively small response. In contrast, the “cardiac unique” gene subset, included an  
268 overall upregulation of genes in Type III interferon signaling (WP2113) and  
269 downregulation of genes in the Striated Muscle Contraction Pathway (WP383), consistent  
270 with the cessation of contractility of SARS-CoV-2 infected cultures (Video S1). In the “lung  
271 unique” subset, we observed an overall downregulation of genes in Amino Acid

272 metabolism (WP3925) and upregulation of genes in Ethanol metabolism resulting in  
273 production of reactive oxygen species (ROS) by CYP2E1 (WP4269) (Figure 3C).

274 Key differences in the transcriptional responses to SARS-CoV-2 infection between  
275 lung AT2 and cardiac cells were the IFN pathways that were activated (Figure 3C, D). By  
276 3 dpi, genes from the Type I, II and III IFN pathways (*IFNB1*, *CXCL10*, *PRKCD*, *IFNL1*,  
277 *IFNL2* and *IFNL3*) were upregulated in cardiac but not lung AT2 cells. Concordant with  
278 the observed increase in transcription by RNASeq, cytokine analysis showed a significant  
279 induction of IL-6, IP-10, IFN- $\lambda$ 1, IFN- $\lambda$ 2/3 and IFN- $\beta$  in infected cardiac cells, but not lung  
280 AT2 cells, at 3 dpi compared to mock-infected controls (Figure 3E). Furthermore, qPCR  
281 showed induction of *IFITM3*, *IFN- $\beta$* , *STAT1* and *STAT2* in infected cardiac cells, and not  
282 lung AT2 cells, compared to mock-infected cells at 3 dpi (Figure S5C). Network analysis  
283 of the GO term response to interferon gamma showed multiple genes within the network  
284 were upregulated in infected cardiac but not lung AT2 cells (Figure S5D). Taken together,  
285 SARS-CoV-2 infection in cardiac induces robust Type I, II and III IFN responses but not  
286 in lung AT2 cells.

### 287 **SARS-CoV-2 activates druggable kinases in lung AT2 and cardiac cells**

288 We measured the phosphoproteome to determine the signaling responses of lung  
289 AT2 and cardiac cells to SARS-CoV-2 infection. Cells were either mock-infected or  
290 infected with SARS-CoV-2 and sampled at 0-, 18-, 24- and 72- hours post inoculation  
291 (Figure 4A). Only viral phosphorylation sites were analyzed at the 72 hours timepoint. By  
292 employing recent advances in phosphoproteomics technologies (32), we quantified  
293 >32,000 phosphopeptides in at least three samples (Figure 4B). The phosphoproteomes

294 clustered primarily by tissue origin in PCA (PC1), emphasizing the cell-type specific  
295 nature of signaling (Figure 4C). Time since infection was the second largest factor  
296 affecting clustering by PCA (on PC2), due to the long time-points studied. For this reason,  
297 a 'mock' condition was sampled at every timepoint, enabling identification of infection-  
298 driven signaling. SARS-CoV-2 infection extensively regulated cellular signaling, with at  
299 least 250 phosphopeptides regulated at each timepoint (Figure 4D). Regulation of the  
300 phosphoproteome was most extensive in cardiac cells at 18 hours post-infection (>900  
301 phosphopeptides altered). Remarkably only 12 and 15 phosphopeptides were commonly  
302 regulated between the cardiac and lung AT2 cells at the 18- and 24- hour timepoints,  
303 respectively (Figure 4E). This low overlap of regulation was also observed at the  
304 transcriptional level and indicates that the response to SARS-CoV-2 is highly contextual  
305 and depends strongly on the cell type or tissue of origin.

306 To corroborate this, we sought to identify the molecular drivers of the SARS-CoV-  
307 2 infection response, by integrating RNA-seq and phosphoproteomics datasets using  
308 ExIR (<https://influential.erc.monash.edu/>). This analysis revealed that the top 3 drivers of  
309 SARS-CoV-2 infection response in cardiac cells (*SP110*, *STAT1* and *DTX3L*) were  
310 activators of the interferon response (Fig. 4F, G). In contrast, no strong interferon pathway  
311 activators were identified in the top drivers of the infection response in lung AT2 cells,  
312 confirming the specificity of the interferon response only in cardiac cells. To determine  
313 the cellular context of SARS-CoV2-regulated signaling, we tested for enrichment of  
314 cellular components (Figure S6A). Endosomal components almost uniquely enriched in  
315 the SARS-CoV2 response of cardiac cells, and not lung cells (Figure 4H, Figure S6A).  
316 This mirrors the pattern of viral entry occurring via endocytosis in cardiac cells.

317 We next explored the upstream regulators of the SARS-CoV-2 signaling response  
318 to identify molecular targets important for SARS-CoV-2 replication. By mapping reported  
319 kinase-substrate relationships to our phosphoproteomics data, we found that 37 kinases  
320 had substrates that were enriched for regulated phosphosites (Figure S6B, Figure 4I).  
321 We hypothesized that kinases with substrates enriched in up-regulated phosphorylation  
322 sites had increased activity in the SARS-CoV-2 response, and *vice versa* for kinases with  
323 down-regulated sites. The unique signaling responses of cardiac and lung cells was also  
324 evident at the kinase level, as of the 37 kinases enriched in at least one condition, 6 were  
325 significantly enriched in the same direction in both cell types. For kinases such as Protein  
326 Kinase C (PKC), some isoforms had opposite cell type-specific patterns of regulation. Of  
327 the PKC isoforms, PKCD had substrates enriched in upregulated sites in the lung cells,  
328 while PKCT was enriched in the cardiac cells (Figure 4I). This could suggest some  
329 convergence in signaling outcomes despite differing proteins being employed. However,  
330 the gold standard PKC substrate MARCKS S170 was uniquely upregulated in cardiac  
331 cells (Figure 4J).

332 Since SARS-CoV-2 proteins can also be phosphorylated by host kinases, we also  
333 searched our phosphoproteomics data specifically for phosphorylation of SARS-CoV-2  
334 viral proteins. We measured 32 sites on 5 viral proteins (ORF1a, S, M, N and ORF9b  
335 (Table S1). This list includes S206 on the nucleocapsid protein, which has been reported  
336 as an SRSF Protein Kinase 1 (SRPK1) substrate (Figure 4K, (33)).

337 **Differential antiviral activity of candidate compounds in cardiac and lung AT2 cells**

338           Based on the different transcriptional and phosphoproteomics data observed in  
339 lung and cardiac cells, we hypothesized that selected compounds would inhibit SARS-  
340 CoV-2 replication differentially. We interrogated our molecular datasets to predict new  
341 and alternative druggable targets. We selected 9 pathways that were differentially  
342 phosphorylated in SARS-CoV-2 infected lung AT2 and cardiac cells and identified 15  
343 compounds that could inhibit the kinases critical for these pathways. These kinases (and  
344 their inhibitors) included: LIM domain kinase (R-10015), Checkpoint Kinases 2  
345 (CCT241533 HCL), SRSF Protein Kinase 1 (Alectinib, SPHINX31), Cyclin-dependent  
346 Kinases (CDKs) (CCT251545, SNS-032, Palbociclib hydrochloride, Flavopiridol,  
347 Dinaciclib, Abemaciclib, Samuraciclib hydrochloride hydrate, Trilaciclib hydrochloride),  
348 Glycogen synthase kinase-3 (AZD1080) and protein kinase C (Bisindolylmaleimide I). We  
349 also tested an inhibitor of the TGF $\beta$  pathway using an inhibitor of the TGF $\beta$  type II receptor  
350 (GW788388). We screened the compounds at concentrations of 1, 10 and 50  $\mu$ M for  
351 antiviral activity (data not shown) based on which we eliminated three compounds that  
352 targeted CDKs based on their strong toxicity in cardiac cells and lack of activity in lung  
353 cells (Flavopiridol, Dinaciclib, Samuraciclib hydrochloride hydrate). SNS-032 was  
354 analyzed further although it was toxic in cardiac cells because it showed promising  
355 antiviral activity in lung AT2 cells. We evaluated the remaining 12 compounds across a  
356 dose range from 0.04 to 30  $\mu$ M for antiviral activity and cell cytotoxicity in both cardiac  
357 (H9 and NKX2-5)) and lung AT2 (H9) cells. Antiviral activity (% inhibition compared to the  
358 Vehicle control) was tested against nanoluciferase (nLuc)-expressing SARS-CoV-2 and  
359 an ancestral strain of SARS-CoV-2 (VIC01) by measuring luciferase expression and E  
360 gene copies, respectively. NHC was used as a positive control in all the antiviral assays

361 While the CDK8 inhibitor CCT251545 was ineffective in limiting SARS-CoV-2  
362 replication (Figure S7), CDK4/6 inhibitors Abemaciclib, Palbociclib and Trilaciclib  
363 restricted virus replication in at least one cell type (Figure 5A). Abemaciclib and  
364 Palbociclib inhibited virus replication in both cell types, while Trilaciclib hydrochloride  
365 inhibited in cardiac cells with variable inhibition in the lung AT2 cells (Figure 5A).  
366 CDK2/7/9 inhibitor SNS-032 showed significant antiviral activity with minimal cytotoxicity  
367 in lung AT2 cells but was cytotoxic in cardiac cells (Figure 5A). In the lung AT2 cells, CHK  
368 inhibitor CCT241533HCl and PKC inhibitor Bisindolylmaleimide 1 showed some antiviral  
369 activity at the highest concentrations tested but were cytotoxic at these concentrations  
370 (Figure 5B, C). In cardiac cells, antiviral activity was observed with the CHK and PKC  
371 inhibitors at concentrations that were not cytotoxic (Figure 5B, C).

372 Alectinib and SPHINX31, which inhibit SRPK1, inhibited viral replication in both  
373 lung AT2 and cardiac cells (Figure 5D). Our data suggest that while SRPK1 inhibitors can  
374 restrict viral replication in both cell types, greater inhibition was observed in lung AT2  
375 cells. Similar activity of these antiviral drugs was observed in H9-derived cardiac cells  
376 (Figure S7A). Drugs that targeted LIM domain kinase (R-10015) and TGF $\beta$  type II  
377 receptor (GW788388) showed no activity in either cell type (Figure S7B). The GSK-3  
378 inhibitor, AZD1080, showed no antiviral activity in H9-derived lung AT2 and cardiac cells  
379 (Figure S7). However, it did show antiviral activity in NKX2-5 cardiac cells against VIC01  
380 but not the nLuc virus suggesting that removal of ORF7a may affect drug sensitivity  
381 (Figure S7,(2)). Overall, these data show that inhibition of kinases with small molecular  
382 inhibitors can abrogate SARS-CoV-2 replication with differing effectiveness in cardiac and  
383 lung cells.

## 384 **Discussion**

385           Our data from parallel evaluation of SARS-CoV-2 infection in stem cell-derived  
386 cardiac and lung AT2 cells provide valuable insights into virus-host interactions in tissues  
387 that are significantly affected in COVID-19, with implications for rational design of  
388 therapeutic interventions. The key take-home messages from our study are that virus  
389 entry, cellular response, antiviral activity and cytotoxicity differ in SARS-CoV-2 infected  
390 human cardiac and lung AT2 cells and both differ from what is seen in African monkey  
391 kidney derived Vero cells that are widely used for SARS-CoV-2 research. Virus entry in  
392 both human cell types is dependent on ACE2 but further processing of the S protein is  
393 mediated through TMPRSS2 in lung AT2 cells, while infection of cardiac cells is achieved  
394 through the endosomal pathway and Cathepsin L. Host responses are significantly  
395 different, with a strong interferon response following infection in cardiac cells but not in  
396 lung AT2 cells. Phosphoproteomic analysis identified activation of different pathways in  
397 cardiac and lung AT2 cells. Parallel evaluation of antiviral activity and cytotoxicity of drugs  
398 in cardiac and lung AT2 cells reveals several points to consider in COVID-19 therapy,  
399 including the use of drug combinations to target both membrane protease and endosomal  
400 entry pathways, drugs that target SRPK1 and CDKs, and the importance of using relevant  
401 human stem-cell derived models in place of immortalized cell lines such as Vero cells for  
402 assessment of antiviral drugs.

403           Early reports characterizing SARS-CoV-2 demonstrated the requirement of ACE2  
404 for virus entry (34). Our RNA-seq and qPCR analysis of lung and cardiac cells  
405 demonstrated high ACE2 expression in lung AT2 cells and low expression in cardiac cells.  
406 Immunofluorescence analysis of ACE2 expression in lung AT2 cells showed that only a

407 small proportion of cells expressed ACE2, consistent with previous reports showing  
408 heterogeneous ACE2 expression in iPSC-derived and adult AT2 cells (24, 35). Despite  
409 low ACE2 expression in cardiac cells, virus replication was robust in this system achieving  
410 titres of more than 100,000 TCID<sub>50</sub>/mL by days four and six post-infection. Furthermore,  
411 SARS-CoV-2 infection of ACE2 KO lung AT2 and cardiac cells completely abolished virus  
412 growth, demonstrating that ACE2 is required for infection of these cells, consistent with  
413 previous reports using similar models (17, 36-38). Moreover, we showed that SARS-CoV-  
414 2 infection was blocked with a combination of anti-ACE2 antibodies. Anti-ACE2 antibodies  
415 at a low dose did not completely block infection in AT2 cells but did in cardiac cultures,  
416 likely reflecting the difference in ACE2 expression between the cell types. Overall, we  
417 show that ACE2 expression is required for SARS-CoV-2 infection in stem-cell derived  
418 lung AT2 and cardiac cells.

419 To investigate the protease requirements for entry into stem-cell derived AT2 and  
420 cardiac cells, we performed entry inhibition assays with the TMPRSS2 inhibitor Camostat  
421 mesylate and the Cathepsin B/L inhibitor CA-074 Me (39). Camostat inhibited SARS-  
422 CoV-2 infection in AT2 cells, suggesting that TMPRSS2 is required for SARS-CoV-2  
423 infection of AT2 cells, consistent with previous reports (24, 40). In contrast, CA-074 Me  
424 blocked SARS-CoV-2 infection in cardiac cells, demonstrating that Cathepsin L cleavage  
425 through endosomal entry is required for infection of cardiac cells, consistent with previous  
426 studies (17, 37, 38). The ability of SARS-CoV-2 to enter cells through different pathways  
427 may explain why clinical trials of Camostat mesylate in COVID-19 hospitalized patients  
428 and hydroxychloroquine alone did not result in clinical benefit (41). Our data suggest that  
429 a combination of drugs that target both pathways may be more effective *in vivo* and



430 emphasize the importance of antiviral testing in several relevant tissue types. Ou *et al*  
431 reported that 10uM Camostat in combination with 10uM Hydroxychloroquine reduced  
432 virus replication compared to Camostat alone in Calu3 cells (42) and a clinical trial of  
433 Hydroxychloroquine in combination with Camostat is registered at [clinicaltrials.gov](https://clinicaltrials.gov)  
434 (NCT04355052).

435 We found a robust interferon response in cardiac cells, which was not observed in  
436 lung AT2 cells. Induction of interferon in infected cardiac cell cultures has been previously  
437 reported using bulk RNA-seq (36, 38). However, Perez-Bermejo *et al* reported that single  
438 cell RNA-seq of infected iPSC-derived cardiomyocytes showed an induction of  
439 proinflammatory cytokines, but not type I or III interferons (17). A potential explanation for  
440 the discrepancy between our findings and those of Perez-Bermejo *et al* is that the  
441 additional cells present in our cultures (fibroblasts, smooth muscle cells and endothelial  
442 cells, (43)) or bystander cardiomyocytes are responsible for inducing robust interferon  
443 responses.

444 In contrast to cardiac cells, SARS-CoV-2 infection did not induce an interferon  
445 response in lung AT2 cells, consistent with another study of stem-cell derived AT2 models  
446 (44). The difference in host response to infection between cardiac cells and lung AT2  
447 cells may be explained by the viral entry pathways. SARS-CoV-2 replication leads to  
448 detection of double stranded RNA (dsRNA) replication intermediates by Melanoma-  
449 differentiation-associated gene 5 (MDA5) and induction of a robust interferon response  
450 through Mitochondrial Antiviral Signaling Protein (MAVS) signaling (44, 45). Several  
451 studies have identified SARS-CoV-2 proteins (nsp1, nsp5, nsp6, nsp13, nsp15, ORF6  
452 and ORF7b) that inhibit MAVS-induced Type I and III interferon responses (46-48). This

453 mechanism of interferon antagonism likely explains the lack of interferon induction seen  
454 in lung AT2 cells following SARS-CoV-2 infection. In contrast, endosomal entry of SARS-  
455 CoV-2 in cardiac cells may explain the robust induction of interferon. Endosomes contain  
456 toll-like receptors (TLRs) including TLR3 and TLR7/8 that sense dsRNA and ssRNA, with  
457 only TLR3 detectable in cardiomyocytes (49). Furthermore, defects in TLR3 have been  
458 associated with disease severity in patients (50), suggesting TLR3 may play an important  
459 role in inducing interferon responses.

460         Although COVID-19 vaccines are highly effective in preventing severe illness and  
461 death, antiviral compounds are required for the treatment of COVID-19, particularly with  
462 the emergence of variant viruses and reduced effectiveness of vaccines in preventing  
463 symptomatic illness caused by variants of concern. To date, only a handful of drugs  
464 including Remdesivir, Molnupiravir and Paxlovid have been approved for use in  
465 hospitalized COVID-19 patients and additional drugs are needed. In this study, we  
466 established two cellular models relevant to COVID-19 disease that are scalable and  
467 amenable to high throughput screening. We used this system to screen drugs that  
468 advanced to clinical trials based on *in vitro* activity against SARS-CoV-2. We noted poor  
469 antiviral activity of Remdesivir in Vero cells compared to stem cell-derived lung AT2 cells  
470 and cardiac cells. These data are consistent with a previous report showing Remdesivir  
471 is metabolized inefficiently in Vero cells (51) and suggests that Vero cells are not optimal  
472 for screening antiviral compounds against SARS-CoV-2.

473         Based on results from phosphoproteomics analysis, we screened several kinase  
474 inhibitors for their ability to inhibit viral replication in lung AT2 and cardiac cells. Out of 12  
475 compounds we evaluated, three had activity in both AT2 and cardiac cells (SPHINX31,

476 Alectinib, Abemaciclib), one had activity in AT2 cells only (SNS-032), four had activity in  
477 cardiac cells only (CCT241533, Palbociclib, Trilaciclib, Bisindolylmaleimide I) and the  
478 remaining were ineffective. We observed that several CDK inhibitors were toxic at the  
479 concentrations tested, particularly in cardiac cells. Of note SNS-032 showed strong  
480 antiviral activity in lung AT2 cells but induced cardiac cell death; medicinal chemistry  
481 approaches could be explored to limit the toxicity for cardiac cells. Effectiveness of  
482 SRPK1 and CDK inhibitors against SARS-CoV-2 has been reported previously in Vero,  
483 Calu-3, A549-ACE2 cells and primary lung cells (33, 52). However, this is the first study  
484 to show potential toxicity of CDK inhibitors in cardiac cells. Although we observed antiviral  
485 activity in both cell types, SRPK1 inhibitors were effective at lower concentrations in lung  
486 AT2 compared to cardiac cells. Overall, we have identified several antiviral compounds  
487 with distinct effectiveness and toxicity profiles in lung AT2 and cardiac cells, highlighting  
488 the importance of using several cell types for evaluation of antiviral effectiveness.

489 In summary, with paired experiments in human stem cell derived tissue surrogates  
490 of organs that are affected in severe COVID-19, we have demonstrated important  
491 commonalities and several key differences in virus-host interactions in lung and cardiac  
492 cells. While the value of using human lung organoids, A549 and Calu-3 cells for evaluation  
493 of antiviral drugs has been recognized, our work highlights the importance of evaluation  
494 in additional relevant cells (lung and heart) for the evaluation of antiviral activity and  
495 cytotoxicity of drugs that are considered for treatment of COVID-19. This parallel  
496 evaluation in two cell types offers novel insights into rational design of therapeutic  
497 interventions.

498

499 **Acknowledgements**

500 This work was supported by The Medical Research Future Fund (MRF9200007; K.S.,  
501 E.R.P., J.M.P., D.A.E.) and the Victorian State Government (Victorian State Government  
502 (DJPR/COVID-19; KS, MR, ERP, J.P., D.A.E.) and COVID-19 Victorian Consortium (KS).  
503 E.R.P., M.R., D.A.E. are supported by The Novo Nordisk Foundation Center for Stem Cell  
504 Medicine (Grant NNF21CC0073729), The Stafford Fox Medical Research Foundation  
505 and The Royal Children's Hospital Foundation. Fellowship support provided by National  
506 Health and Medical Research Council of Australia (E.R.P. and KS). MCRI is supported  
507 by the Victorian Government's Operational Infrastructure Support Program. The  
508 Melbourne WHO Collaborating Centre for Reference and Research on Influenza is  
509 supported by the Australian Government Department of Health.

510

511 **Author Contributions**

512 Conceptualization and design: E.P, J.P, S.J.H, M.R, D.E and K.S. Data acquisition: R.R,  
513 M.J.G, J.A.N, E.S.S, J.S, E.J.D, M.S, C.M-K, L.Y.Y.L, M.W, H.P, K.K and D.A-B.  
514 Data analysis and Interpretation: R.R, M.J.G, J.A.N, E.S.S, J.S, E.D, M.S, A.S, N.C, H.T.N  
515 and P.D.C. Reagent production: D.D and W-H.T. Manuscript preparation: R.R, M.J.G,  
516 J.A.N and K.S. Manuscript edits and proofing: E.S.S, J.S, E.J.D, M.S, E.P, J.P, S.H, M.R  
517 and D.E. All authors critically reviewed and approved the final version of the manuscript.

518

519

520

521 **Materials and Methods**

522 **Cells.** African green monkey kidney epithelial (Vero cells, ATCC Cat. CCL-81), Vero  
523 hSLAM (Merck, Car. 04091501), Calu-3 (ATCC, Cat. HTB-55) and VeroE6-TMPRSS2  
524 (CellBank Australia, Cat. JCRB1819) cells were cultured at 37°C and 5% CO<sub>2</sub>. Vero cell  
525 media: Minimum Essential Media (MEM) (Media Preparation Unit, Peter Doherty Institute)  
526 supplemented with 5% Fetal Bovine Serum (FBS, Bovogen, Cat. SFBS), 50U/mL  
527 Penicillin and 50µg/mL Streptomycin (PenStrep, Thermo Fisher Scientific, Cat. 15070-  
528 063), 2mM GlutaMAX (Thermo Fisher Scientific, Cat. 35050061) and 15 mM HEPES  
529 (Thermo Fisher Scientific, Cat. 15630130). Vero hSLAM cell media: MEM supplemented  
530 with 7% FBS, PenStrep, 2mM GlutaMAX, 15 mM HEPES and 0.4 mg/mL G418 Sulfate  
531 (Gibco, Cat. 10131027). Calu-3 cell media: MEM containing L-glutamine and sodium  
532 bicarbonate (Sigma, Cat. M4655) supplemented with 10% FBS, PenStrep, 1x non-  
533 essential amino acids (Gibco, Cat. 11140050) and sodium pyruvate (Fisher Scientific,  
534 Cat. BP356-100). VeroE6-TMPRSS2 cell media: Dulbecco's Minimum Essential Media  
535 (DMEM) (Media Preparation Unit, Peter Doherty Institute) supplemented with 10% FBS,  
536 PenStrep, 2mM GlutaMAX and 1 mg/mL G418 Sulfate.

537

538 **Viruses.** SARS-CoV-2 viruses hCoV-19/Australia/VIC01/2020 (VIC01, GISAID ID:  
539 EPI\_ISL\_406844), hCoV-19/Australia/VIC17991/2020 (Alpha variant, GISAID ID:  
540 EPI\_ISL\_779606), hCoV-19/Australia/QLD1520/2020 (Beta variant, GISAID ID:  
541 EPI\_ISL\_968081), hCoV-19/Australia/VIC18440/2021 (Delta variant, GISAID ID:  
542 EPI\_ISL\_1913206), hCoV-19/Australia/NSW-RPAH-1933/2021 (Omicron BA.1 variant,  
543 GISAID ID: EPI\_ISL\_6814922) and hCoV-19/Australia/VIC35864/2022 (Omicron BA.2

544 variant, GISAID ID: EPI\_ISL\_8955536) were a kind gift obtained from the Victorian  
545 Infectious Diseases Reference Laboratory (VIDRL). hCoV-19/Japan/TY7-503/2021  
546 (Gamma variant, GISAID ID: EPI\_ISL\_877769, NR-54982) was obtained through BEI  
547 Resources, NIAID, NIH, contributed by National Institute of Infectious Diseases. icSARS-  
548 CoV-2-nLuc virus was a kind gift from Prof Ralph S. Baric from the Department of  
549 Microbiology and Immunology, University of North Carolina at Chapel Hill, Chapel Hill,  
550 NC, USA (2). SARS-CoV-2 VIC01 was propagated in Vero and Vero hSLAM cells in Vero  
551 infection medium (serum-free MEM in the presence of 1µg/mL TPCK-Trypsin (Cat.  
552 LS003740)). SARS-CoV-2 Alpha, Beta, Gamma and Delta variants were propagated in  
553 Vero hSLAM cells in infection medium (serum-free MEM with 1µg/mL TPCK-Trypsin).  
554 SARS-CoV-2 Omicron BA.1 and BA.2 variants were passaged in Calu3 cells in infection  
555 media (MEM containing 2% FBS). Virus stocks were stored at -80°C and titered as  
556 described below.

557

558 **Virus Titration.** Virus titrations were performed in 96 well plates with confluent Vero and  
559 VeroE6-TMPRSS2 monolayers. Cells were washed with plain MEM and replaced with  
560 180 µL of serum-free media containing 1µg/mL TPCK-Trypsin. Each sample was titrated  
561 in quadruplicate by adding 20µL of supernatant to first well and performing 10-fold serial  
562 dilutions. Cells were incubated at 37°C and assessed microscopically for SARS-CoV-2-  
563 induced cytopathic effect (CPE) on day 4. Virus titres are expressed as mean  
564  $\log_{10}$ TCID<sub>50</sub>/mL.

565

566 **Viral RNA extraction and RT-PCR.** RNA was extracted as per the manufacturer's  
567 recommendation using QiaCube HT (Qiagen) and QiaAmp 96 Virus QiaCube HT kit  
568 (Qiagen, Cat. 57731). RT-PCR reaction was setup using SensiFast Probe No-ROX One-  
569 Step Kit (Bioline, Cat. BIO-76005) using the following primers/probes: E\_Sarbeco\_F1: 5'-  
570 ACAGGTACGTTAATAGTTAATAGCGT-3', E\_Sarbeco\_R2: 5'-  
571 ATATTGCAGCAGTACGCACACA-3'), E\_Sarbeco\_P1\_FAM: 5'-  
572 AACTAGCCATCCTTACTGCGCTTCG-3'. Serial 10-fold dilutions of plasmid encoding  
573 the viral E gene were used to generate a standard curve for calculating the virus genome  
574 copies in the samples.

575

576 **Lung alveolar type 2 cell differentiation.** Induced pluripotent H9 (female) stem cells  
577 were seeded onto flasks coated with Matrigel (Corning, Cat. 354230) in Essential 8  
578 medium (Thermo Fisher Scientific, Cat. A1517001). After 48 h, medium was changed  
579 daily with RPMI 1640 (Thermo Fisher Scientific, Cat. 21870084) supplemented with B-27  
580 (Gibco, Cat. 17504044), 100ng/mL Activin A (Peprotech, Cat. 120-14P), 1 $\mu$ M CHIR99021  
581 (Sigma-Aldrich, Cat. SML1046), PenStrep for 3 days. On days 4-8, medium was changed  
582 daily with DMEM/F12 media (Thermo Fisher Scientific, Cat. 105650) supplemented with  
583 N2 (Gibco, Cat. 17502048), B27, 0.05mg/mL Ascorbic Acid (Sigma-Aldrich, Cat.  
584 A92902), 0.4mM Monothioglycerol (Sigma-Aldrich, Cat. M6145), 2 $\mu$ M Dorsomorphin  
585 (Stemcell Technologies, Cat.72102), SB431542 (Miltenyi Biotec, Cat. 130-106-543) and  
586 PenStrep. On days 9-12, medium was changed daily with DMEM/F12-based medium with  
587 B27, 0.05mg/mL Ascorbic Acid, 0.4mM Monothioglycerol, 20ng/mL BMP4 (Peprotech,  
588 Cat. 120-05ET), 0.5 $\mu$ M Retinoic Acid (ATRA) (Sigma-Aldrich, Cat. R2625), 3 $\mu$ M

589 CHIR99021, PenStrep. Day 12 and onwards, medium was changed every other day with  
590 DMEM/F12 supplemented with B27, 0.05mg/ml Ascorbic Acid, 0.4mM Monothioglycerol,  
591 10ng/mL FGF10 (Stemcell Technologies, Cat. 78037), 10ng/mL FGF7 (Peprotech, Cat.  
592 10019), 3 $\mu$ M CHIR99021, 50nM Dexamethasone (Sigma-Aldrich, Cat. D4902), 0.1mM 8-  
593 Bromoadenosine 3',5'-cyclic monophosphate (8-Br-cAMP) (Sigma-Aldrich, Cat.  
594 B5386), 0.1mM 3-Isobutyl-1-methylxanthine (IBMX) (Sigma-Aldrich, Cat. I5879) and  
595 PenStrep. Cultures were embedded onto Matrigel on day 18 in 12-well plates. On day 30,  
596 organoids were dissociated in TrypLE (Thermo Fisher Scientific, Cat. 12604013) for 3  
597 mins before re-embedding in Matrigel. Lung organoids were maintained for experiments  
598 between passage 2-8 prior to dissociation with TrypLE and seeding onto Geltrex (Gibco,  
599 Cat. A1413201) -coated plates supplemented with Y-27632 (Selleck Chemicals, Cat,  
600 S1049) at the initial seeding step. Cells were maintained for a further 7-10 days in 2D  
601 culture until infection at 70%+ confluency.

602

603 **Cardiac Cell Differentiation.** The human embryonic stem cell lines HES3 *NKX2-5<sup>eGFP/w</sup>*  
604 and H9 (both female), and human induced pluripotent stem cell line MCRIi010-A (male),  
605 were used for viral infection studies in 2D monolayer cultures. Each stem cell line and  
606 their derivatives were cultured as outlined previously (30). Cardiomyocytes cultures were  
607 differentiated as previously described and cryopreserved at day 10 following  
608 differentiation (27). Cells were subsequently thawed in basal differentiation media  
609 containing RPMI 1640 (Thermo Fisher Scientific, Cat. 21870), 2% B27 without vitamin A  
610 (Thermo Fisher Scientific, Cat. 12587), 1% Glutamax (Thermo Fisher Scientific, Cat.  
611 35050), 0.5% PenStrep (Thermo Fisher Scientific, Cat. 15070) and 10  $\mu$ M Y-27632 for 24



612 hours at 37°C. Cells were then maintained in basal differentiation medium for an  
613 additional 2 days. To enrich for cardiomyocytes, cells were cultured for 2 days in lactate  
614 purification media as described previously (53). The cells were maintained in maturation  
615 media, as described previously (43), from day 15 to day 23 post differentiation prior to  
616 viral infection.

617

618 **CRISPR/Cas9 ACE2 KO line generation.** For CRISPR/Cas9 knock-out of *ACE2*,  
619 synthetic oligonucleotides containing sgRNAs (5' sgRNA 5'-  
620 CACCGTCTAGGGAAAGTCATTCAG-3' and 5'- AAACCTGAATGACTTTCCCTAGAC-3'  
621 and 3' sgRNA 2 5'- CACCGCAGTAATCTAATCTTTAAG-3' and 5'-  
622 AAACCTTAAAGATTAGATTACTGC-3' targeting the first coding exon of *ACE2* were  
623 generated with overhangs for BbsI digestion and subsequent cloning into pX458  
624 (Addgene, Cat. 48138) as described previously. Cells were harvested with TrypLE, and  
625 transfections were performed using the Neon Transfection System (Thermo Fisher  
626 Scientific). Electroporation was performed in a 100 µL tip using the following conditions:  
627 1050 V, 30 ms, 2 pulses. Following electroporation, cells were transferred to flasks  
628 containing mitotically inactivated MEFs and HES or iPSC media (without PenStrep) with  
629 5 µM Y-27632, which was omitted in subsequent media changes. Cells transiently  
630 expressing EGFP were single cell sorted, colonies were grown for 2 weeks and screened  
631 via PCR.

632

633 **Clone characterization: karyotyping, pluripotency, and differentiation.** Genomic  
634 integrity of ACE2 KO lines was assessed using the Illumina Infinium GSA-24 v2.0 and

635 was performed by the Victorian Clinical Genetics Service, Royal Children's Hospital  
636 (Melbourne). Pluripotency was examined via expression of EPCAM-BV421 (Biolegend,  
637 Cat. 324220), CD9-FITC (BD Biosciences, Cat. 555371) and SSEA4-PE/Cy7 (Biolegend,  
638 Cat. 330420) expression using flow cytometry. IgG-BV421, IgG-FITC and IgG-PE/Cy7  
639 (Biolegend, Cat. 400158 and BD Biosciences Cat. 555748, 400126) were used for isotype  
640 controls. Cardiac cultures generated from the WT and ACE2 KO lines were then  
641 assessed using cardiomyocyte specific markers, cardiac troponin T and  $\alpha$ -Actinin  
642 (Abcam, Cat. AB45932, A7811) to demonstrate comparable levels of cardiomyocyte  
643 differentiation. AF488 and AF647 (Thermo Fisher Scientific Cat. A11034, A21236) were  
644 used for detection on the LSR Fortessa X-20 Flow cytometer (BD Biosciences).

645

646 **Quantitative PCR.** Total RNA was extracted using Trizol reagent (Thermo Fisher  
647 Scientific, Cat. 15596026) following the manufacturer's protocol or using the RNeasy Mini  
648 Kit (Qiagen, Cat. 74106). cDNA synthesis was conducted using the SuperScript™ VIL0™  
649 Master Mix (Thermo Fisher Scientific, Cat. 11755050) according to the manufacturer's  
650 instructions. Quantitative real-time PCR (qPCR) was performed with either TaqMan Fast  
651 Advanced Master Mix, TaqMan™ Gene Expression Master Mix or PowerUp™ SYBR™  
652 Green Master Mix (Thermo Fisher Scientific, Cat. 4444557, 4369510 or A25777  
653 respectively). The Taqman probes (Thermo Fisher Scientific, Cat. 4453320) are listed in  
654 Table S3. Green are as follows: ACE2 5'-TTAACCACGAAGCCGAAGAC-3' and 5'-  
655 TACATTTGGGCAAGTGTGGA-3'; 5'-CCTGGCTGAAAGACCAGAAC-3' and 5'-  
656 GCAACAGATGATCGGAACAG-3'; and 5'-GGTTGGCATTGTCATCCTG-3' and 5'-  
657 GGAGGTCTGAACATCATCAGTG-3'. Glyceraldehyde-3-phosphate dehydrogenase

658 (*GAPDH*) (5' TGCACCACCAACTGCTTAGC-3' and 5' GGCATGGACTGTGGTCATGAG  
659 -3') was used as a housekeeping gene for normalization.

660 **Western blot analysis.** hESC and iPSC-derived cardiac and lung AT2 cells were lysed  
661 in high salt RIPA buffer (RIPA+0.5M NaCl) with added Protease inhibitor (Sigma-Aldrich,  
662 Cat. 5056489001) and phosSTOP (Roche, Cat. 4906845001). Lung AT2 lysates were  
663 made using Laemmli sample buffer (Bio-Rad, Cat: #1610737EDU). Total protein  
664 concentration was measured by BCA assay (Thermo Fisher Scientific, Cat. 23227). 20  
665 µg of samples were loaded into a 4–20% Mini-PROTEAN pre-cast gel (Bio-Rad, Cat:  
666 4561093) and ran at 70 V for 30 min, followed by ~70 min at 120 V. Protein was  
667 transferred to PVDF membrane and blocked in 5% skim milk in Tris-buffered saline  
668 contain Tween-20 (TBST) for 1 h. The membrane was incubated with primary antibodies  
669 against ACE2 (Abcam, Cat. 15348, 1:1000 in 5% skim milk overnight at 4°C) and GAPDH  
670 as a loading control (Fitzgerald Industries International, Cat. 10R-2932, 1:3000 in 5%  
671 skim milk/TBST for 1 h at room temperature (RT)). HRP-linked antibodies (Bio-Rad, Cat.  
672 1706516 and Cell Signaling Technology, Cat. 7074S) were then used at 1:3000 in skim  
673 milk/TBST for 1 h at RT. Blots were imaged on a GE Amersham Imager 680 following  
674 addition of ECL substrate (Bio-rad, Cat. 170-5060).

675

676 **Virus growth in lung AT2, cardiac and Vero cells.** Infection of human ESC and iPSC-  
677 derived cells and Vero cells was performed in 24 well tissue culture plates. Vero cells  
678 were washed with MEM prior to infection. Media was removed and replaced with 10<sup>4</sup>  
679 TCID<sub>50</sub> of SARS-CoV-2 in 100ul and incubated for 1 h at RT. The inoculum was removed,  
680 cells washed twice with cell-specific media and refed with media. The second wash was

681 harvested for day 0 sampling. Vero cells were cultured in serum-free media containing  
682 1µg/mL TPCK-Trypsin. Supernatants were collected each day and media was  
683 replenished. Harvested supernatants were stored at -80°C to determine infectious virus  
684 titres and E gene copies.

685

686 **Immunofluorescence.** Cells were fixed with 4% PFA and blocked with blocking buffer  
687 (1% horse serum and 0.1% Triton X-100 in phosphate-buffered saline (PBS)) and stained  
688 with primary antibodies (cTNT: Thermo Fisher Scientific, Cat. MA1-16687, 1:200; dsRNA:  
689 Australian Bioresearch, Cat, ab01299-2.0, 1:200; SP-C: Santa Cruz Biotechnology, Cat.  
690 sc-518029,1:100; AQP5: Santa Cruz Biotechnology, Cat. sc-514022, 1:100; NKX2.1:  
691 Abcam, Cat. ab76013, 1:100) overnight at 4°C. Cells were washed with PBS and stained  
692 with secondary antibodies from Invitrogen (Mouse IgG2a AF594 Cat. A21135, Mouse  
693 IgG1 AF647 Cat. A21240, Rabbit IgG AF555 Cat. A21428, Mouse IgG2b AF488 Cat.  
694 A21141, Mouse IgG2a AF555 Cat. A21127, Rabbit IgG AF647 Cat. 21244) and Hoechst  
695 33342 (Life Technologies) at 1:1000 in blocking buffer for 1-2 hours at RT. For ACE2  
696 staining, cells were blocked with 10% normal goat serum (Thermo Fisher Scientific, Cat.  
697 PCN5000) in PBSTT (PBS with 0.1% Triton-X and 0.1% Tween). Primary ACE2  
698 antibodies (WCSL141, (23)) and cTNT antibodies were left to incubate overnight at 4°C  
699 in 5% goat serum in PBSTT before being washed in PBS and probed with secondary  
700 antibodies (Jackson Immuno, Cat. 709-116-098 at 1:100 and Hoescht at 1:200).

701

702 **SARS-CoV-2 entry inhibition.** Lung AT2 and cardiac cells seeded into 24 well plates  
703 were treated with 100µL of α-ACE2 antibodies (WCSL141 and WCSL148, (23)), human

704 IgG isotype control, Camostat Mesylate (Sigma Aldrich, Cat. SML0057) or DMSO for 1 h  
705 at 37°C. Subsequently,  $10^4$  TCID<sub>50</sub> of SARS-CoV-2 was added to cells and incubated for  
706 1 h at 37°C. Virus inoculum was removed, and cells were washed with plain MEM twice  
707 before replacement with the 500µL cell-specific culture media. For CA-074 Me inhibition,  
708 cells seeded into 24 well plates were treated with 200µL of CA-074 Me (Selleck  
709 Chemicals, Cat. S7420) for 2 h at 37°C. Subsequently,  $10^4$  TCID<sub>50</sub> of SARS-CoV-2 was  
710 added to cells and incubated for 1 h at 37°C. Supernatant samples were obtained daily,  
711 and the media was replaced with drug-containing media until day 3. Infectious virus titres  
712 and E gene copies were determined as detailed above.

713

714 **Antiviral testing.** Compounds remdesivir (MedChemExpress, Cat. HY104077), NHC ( $\beta$ -  
715 D-N4-hydroxycytidine, MedChemExpress, Cat. HY125033), favipiravir (Toyama  
716 Chemicals Co. Ltd, Japan, T705), tizoxanide (Romark Laboratories, Tampa, FL)  
717 chloroquine (Sigma Aldrich, Cat. C6628) and piperazine (Sigma Aldrich, Cat. C7874)  
718 were tested in lung AT2, cardiac and Vero cells in 24 well tissue culture plates. Vero cells  
719 were washed with MEM prior to addition of 100µL of cell type-specific media containing  
720 diluted compounds. The vehicle controls were prepared to contain the same amount of  
721 vehicle (DMSO or water) as the 10µM of compound. One hour after addition of diluted  
722 compound, 100µL of media containing  $10^4$  TCID<sub>50</sub> of SARS-CoV-2 (and 1µg/ml TPCK-  
723 Trypsin for Vero cells) was added and incubated for an additional hour at RT. The  
724 inoculum was removed and replaced with 500µL of cell-specific media containing diluted  
725 compounds. At 3 dpi, supernatants were harvested and stored at -80°C. Infectious virus  
726 titres and E gene copies were determined as detailed above.

727 Kinase inhibitor compounds (Table S2) were tested in lung AT2 and cardiac cells seeded  
728 in 96 well culture plates. Cells were incubated with 200 $\mu$ L of cell-specific media containing  
729 30 $\mu$ M to 0.04 $\mu$ M of compound for 2 h at 37°C. DMSO was maintained consistently to a  
730 final concentration of 0.1%. After 2 h, 10<sup>4</sup> TCID<sub>50</sub> of icSARS-CoV-2-nLuc or VIC01 was  
731 added to each well (20 $\mu$ L total) and cells were incubated at 37°C for 2 days. Cell  
732 supernatant from VIC01-infected cells was collected for measurement of E-gene copies  
733 as detailed above. For nLuc virus detection, cells were lysed with Passive Lysis Buffer  
734 (Promega, Cat. E1941) and luciferase expression measured using Nano-Glo Luciferase  
735 Assay System (Promega, Cat. N1130) as per the manufacturer's instructions.  
736 Luminescence was measured on FLUOstar Omega (BMG Labtech).

737

738 **Antiviral toxicity testing.** All compounds were tested in lung AT2, cardiac and Vero cells  
739 in 96 well tissue culture plates. Vero cells were washed with 200 $\mu$ L of MEM. After  
740 removal of media, 100 $\mu$ L of cell type-specific media containing diluted compound was  
741 added. At day 2 (Kinase inhibitors) or day 3 (other compounds), cell viability was  
742 measuring using the CellTiter-Glo®2.0 cell viability kit (Promega, Cat. G9241) as per  
743 manufacturer's recommendations. Luminescence was measured on FLUOstar Omega  
744 (BMG Labtech).

745

746 **RNA Sequencing Analysis.** Human stem cell-derived cardiac and lung cells grown in 24  
747 well tissue culture plates were infected with 10<sup>4</sup> TCID<sub>50</sub> of SARS-CoV-2. At 0-, 1- and 3-  
748 days post-infection, supernatant was removed, and the cell monolayer was lysed with

749 500µL of TRIzol reagent (Life Technologies Australia PTY LTD, Cat. 15596018). RNA  
750 was extracted following the manufacturer's protocol.  
751 RNA Sequencing data were demultiplexed using a modified version of the Sabre  
752 demultiplexer to produce a single fastq file per sample. Fastq files were processed using  
753 the RNAsik pipeline [<https://doi.org/10.21105/joss.00583>]. Reads were aligned to  
754 EnsEMBL GRCh38 (54) using the STAR aligner (55) and duplicates were marked with  
755 Picard [["http://broadinstitute.github.io/picard/"](http://broadinstitute.github.io/picard/)]. Aligned reads were quantified to gene  
756 level counts using featureCounts (56). Next, differential gene expression analysis was  
757 performed in Degust [<https://doi.org/10.5281/zenodo.3501067>] using the EdgeR QL  
758 method (57) to produce sets of differentially expressed genes for Cardiac and Lung  
759 conditions, respectively. The sets of differentially expressed genes were processed for  
760 pathway enrichment using Metascape (58) with default parameters except that only the  
761 WikiPathways ontology was used. Figures were generated using R [4] and tidyverse  
762 [<https://doi.org/10.21105/joss.01686>] packages. RNA-seq data have been submitted to  
763 the NCBI GEO database (GSE212003).

764

765 **LEGENDplex.** Cytokine/chemokine concentrations in supernatant from mock and SARS-  
766 CoV-2 infected lung AT2 and cardiac cells were analyzed using the LEGENDplex human  
767 anti-virus response panel (Biolegend, Cat. 740390) following the manufacturer's  
768 instructions. Samples were run on a BD FACSCanto II and analyzed using  
769 LEGENDplex™ Data Analysis Software Suite (v8).

770

771 **Phosphoproteomics.** Human cardiac and lung AT2 cells grown in 6 well tissue culture  
772 plates inoculated with mock or SARS-CoV-2 were harvested at 0-, 18- and 24- hours  
773 post-inoculation for phosphoproteomic analysis. Briefly, media was removed and  
774 replaced with 500 $\mu$ L of respective media containing  $5 \times 10^4$  TCID<sub>50</sub> of SARS-CoV-2. Mock  
775 wells received 500 $\mu$ L of media alone. After infection for 1 h, inoculum was removed and  
776 replaced with 2000 $\mu$ L of respective media. At selected timepoints post-infection, wells  
777 were washed four times with 5ml of ice-cold TBS. After TBS removal, cells were lysed  
778 with 100 $\mu$ L of lysis buffer (6M Guanidinium chloride, 100mM Tris pH 8.5), inactivated at  
779 95°C for 5 minutes and frozen at -80°C. Upon thawing, lysates were sonicated with a tip-  
780 probe sonicator (50% output power, 30 seconds), and an aliquot was diluted 1:5 in 8M  
781 Urea to determine protein concentration by BCA assay. Protein (250  $\mu$ g) was diluted in  
782 SDC buffer, reduced and alkylated at 45°C for 5 min by the addition of 10 mM Tris (2-  
783 carboxyethyl) phosphine (TCEP)/40 mM 2-Chloroacetamide (CAA) pH 8, and digested  
784 by the addition of 1:100 Lys-C and Trypsin overnight at 37°C with agitation (1,500 rpm).  
785 After digestion phosphopeptides were enriched in parallel using the high-sensitivity  
786 EasyPhos workflow as previously described (32). Eluted phosphopeptides were dried in  
787 a SpeedVac concentrator (Eppendorf) and resuspended in MS loading buffer (0.3%  
788 TFA/2% acetonitrile) prior to LC-MS/MS measurement.

789 Phosphopeptides were loaded onto a 55 cm column fabricated in-house, from 75 $\mu$ M inner  
790 diameter fused silica packed with 1.9 $\mu$ M C18 ReproSil particles (Dr. Maisch GmbH), and  
791 column temperature was maintained at 60°C using a Sonation column oven. A Dionex  
792 U3000 RSLC Nano HPLC system (Thermo Fisher Scientific) was interfaced with a Q  
793 Exactive HF X benchtop Orbitrap mass spectrometer using a NanoSpray Flex ion source



794 (Thermo Fisher Scientific). Peptides were separated with a binary buffer system of 0.1%  
795 (v/v) formic acid (buffer A) and 80% (v/v) acetonitrile / 0.1% (v/v) formic acid (buffer B) at  
796 a flow rate of 400nL/min, and separated with a gradient of 3-19% buffer B over 40 min,  
797 followed by 19-41% buffer B over 20 min, resulting in a gradient time of 60 min. Peptides  
798 were analyzed in Data Independent Acquisition (DIA) mode, with one full scan (350-1,400  
799 m/z; R = 120,000 at 200 m/z) at a target of 3e6 ions, followed by 48 DIA MS2 scans using  
800 HCD (target 3e6 ions; max. IT 22 ms; isolation window 14.0 m/z; NCE 25%, window  
801 overlap 1m/z), detected in the Orbitrap mass analyzer (R = 15,000 at 200 m/z). RAW MS  
802 data was processed using Spectronaut v15.4.210913.50606, with searches performed  
803 using the directDIA method against the Human and SARS-CoV2 UniProt databases  
804 (January 2021 and October 2021 releases respectively). Default “BGS Phospho PTM  
805 Workflow” settings were used, with a linear model used for PTM Consolidation, Cross  
806 Run Normalization enabled, and a localization Probability Cutoff of 0.5. Data filtering  
807 mode was set to ‘Qvalue’.

808 Phosphoproteomes were log transformed and median normalized. Ratios of SARS-CoV-  
809 2 to the median mock values were taken for each timepoint in each cell type. Regulated  
810 phosphopeptides were identified with a one-way ANOVA for each cell type separately. P-  
811 values were adjusted for multiple hypothesis testing with the q-value R package.  
812 Dunnett’s post hoc tests were performed to determine the timepoint at which the  
813 regulation occurred, with the 0-hour timepoint as the control condition. Enrichment of  
814 regulated phosphosites was determined by ranking phosphosites by their Log2FC and  
815 performing a modified weighted gene set enrichment analysis, implemented in the R

816 package ksea. Cellular component annotation was obtained from GO and reported  
817 kinase-substrate relationships were obtained from PhosphoSitePlus.

818

819 **Integration of RNA-seq and phosphoproteomics.** To systematically identify and  
820 prioritize the drivers of the molecular response to SARS-CoV-2 infection, based on the  
821 combination of transcriptomics and phospho-proteomics data, we run the ExIR model  
822 separately on heart and lung datasets using the R package influential ([https://cran.r-](https://cran.r-project.org/package=influential)  
823 [project.org/package=influential](https://cran.r-project.org/package=influential)). ExIR is a versatile one-stop model for the extraction and  
824 prioritization of candidates from high-throughput data. In particular, we used the following  
825 three input data for running the ExIR model: 1) entire transcriptomic dataset as the  
826 experimental data, 2) table of differentially expressed genes, and 3) the list of differentially  
827 phosphorylated proteins at 72-hour time-point as the desired list of features. In this way,  
828 the ExIR model is built based on the differentially phosphorylated proteins in the context  
829 of the transcriptomic data. Lastly, the top five drivers prioritized by ExIR were visualized  
830 separately for lung and heart dataset.

831

832 **Statistical analysis.** All data were plotted and analyzed using GraphPad Prism 9. Log<sub>10</sub>  
833 virus titres and E gene copies were analyzed using either a student's T-test or two-way  
834 ANOVA with Tukey's or Dunnett's multiple comparisons test as appropriate. \*, p<0.05; \*\*,  
835 p<0.01; \*\*\*, p<0.001 and \*\*\*\*, p<0.0001. Dotted lines indicate the lower limit of detection  
836 of the assay unless indicated otherwise. Data are representative of at least two  
837 independent experiments showing mean (±SD) unless indicated otherwise. Antiviral  
838 activity and cytotoxicity data for the kinase inhibitors (Fig 5 and S7) was analyzed by

839 calculating percent inhibition/viability relative to vehicle control. Curve fitting was  
840 performed using non-linear regression (four parameters – variable slope) with data  
841 constrained between 0 and 100.

842

843

844

845

846

847

848

849

850

851

852

853

854

855

856

857

858

859

860

861

## 862 **References**

- 863 1. Chen PZ, Bobrovitz N, Premji ZA, Koopmans M, Fisman DN, and Gu FX. SARS-  
864 CoV-2 shedding dynamics across the respiratory tract, sex, and disease severity  
865 for adult and pediatric COVID-19. *Elife*. 2021;10.
- 866 2. Hou YJ, Okuda K, Edwards CE, Martinez DR, Asakura T, Dinnon KH, 3rd, et al.  
867 SARS-CoV-2 Reverse Genetics Reveals a Variable Infection Gradient in the  
868 Respiratory Tract. *Cell*. 2020;182(2):429-46 e14.
- 869 3. Huang C, Huang L, Wang Y, Li X, Ren L, Gu X, et al. 6-month consequences of  
870 COVID-19 in patients discharged from hospital: a cohort study. *Lancet*.  
871 2021;397(10270):220-32.
- 872 4. Nalbandian A, Sehgal K, Gupta A, Madhavan MV, McGroder C, Stevens JS, et al.  
873 Post-acute COVID-19 syndrome. *Nat Med*. 2021;27(4):601-15.
- 874 5. Lazzerini PE, Laghi-Pasini F, Boutjdir M, and Capecchi PL. Inflammatory cytokines  
875 and cardiac arrhythmias: the lesson from COVID-19. *Nat Rev Immunol*.  
876 2022;22(5):270-2.
- 877 6. Shi S, Qin M, Shen B, Cai Y, Liu T, Yang F, et al. Association of Cardiac Injury  
878 With Mortality in Hospitalized Patients With COVID-19 in Wuhan, China. *JAMA*  
879 *Cardiol*. 2020;5(7):802-10.
- 880 7. Puntmann VO, Carerj ML, Wieters I, Fahim M, Arendt C, Hoffmann J, et al.  
881 Outcomes of Cardiovascular Magnetic Resonance Imaging in Patients Recently  
882 Recovered From Coronavirus Disease 2019 (COVID-19). *JAMA Cardiol*.  
883 2020;5(11):1265-73.

- 884 8. Goyal P, Choi JJ, Pinheiro LC, Schenck EJ, Chen R, Jabri A, et al. Clinical  
885 Characteristics of Covid-19 in New York City. *N Engl J Med.* 2020;382(24):2372-  
886 4.
- 887 9. Shao MJ, Shang LX, Luo JY, Shi J, Zhao Y, Li XM, et al. Myocardial injury is  
888 associated with higher mortality in patients with coronavirus disease 2019: a meta-  
889 analysis. *J Geriatr Cardiol.* 2020;17(4):224-8.
- 890 10. Deinhardt-Emmer S, Wittschieber D, Sanft J, Kleemann S, Elschner S, Haupt KF,  
891 et al. Early postmortem mapping of SARS-CoV-2 RNA in patients with COVID-19  
892 and the correlation with tissue damage. *Elife.* 2021;10.
- 893 11. Wang XM, Mannan R, Xiao L, Abdulfatah E, Qiao Y, Farver C, et al.  
894 Characterization of SARS-CoV-2 and host entry factors distribution in a COVID-19  
895 autopsy series. *Commun Med (Lond).* 2021;1:24.
- 896 12. Schneider J, Pease D, Navaratnarajah C, Halfmann P, Clemens D, Ye D, et al.  
897 SARS-CoV-2 direct cardiac damage through spike-mediated cardiomyocyte  
898 fusion. *Research Square.* 2020.
- 899 13. Zhou P, Yang XL, Wang XG, Hu B, Zhang L, Zhang W, et al. A pneumonia  
900 outbreak associated with a new coronavirus of probable bat origin. *Nature.*  
901 2020;579(7798):270-3.
- 902 14. Shang J, Wan Y, Luo C, Ye G, Geng Q, Auerbach A, et al. Cell entry mechanisms  
903 of SARS-CoV-2. *Proc Natl Acad Sci U S A.* 2020;117(21):11727-34.
- 904 15. Hoffmann M, Kleine-Weber H, Schroeder S, Kruger N, Herrler T, Erichsen S, et al.  
905 SARS-CoV-2 Cell Entry Depends on ACE2 and TMPRSS2 and Is Blocked by a  
906 Clinically Proven Protease Inhibitor. *Cell.* 2020;181(2):271-80 e8.

- 907 16. Ou X, Liu Y, Lei X, Li P, Mi D, Ren L, et al. Characterization of spike glycoprotein  
908 of SARS-CoV-2 on virus entry and its immune cross-reactivity with SARS-CoV.  
909 *Nat Commun.* 2020;11(1):1620.
- 910 17. Perez-Bermejo JA, Kang S, Rockwood SJ, Simoneau CR, Joy DA, Silva AC, et al.  
911 SARS-CoV-2 infection of human iPSC-derived cardiac cells reflects cytopathic  
912 features in hearts of patients with COVID-19. *Sci Transl Med.* 2021;13(590).
- 913 18. Sungnak W, Huang N, Becavin C, Berg M, Queen R, Litvinukova M, et al. SARS-  
914 CoV-2 entry factors are highly expressed in nasal epithelial cells together with  
915 innate immune genes. *Nat Med.* 2020;26(5):681-7.
- 916 19. Qi F, Qian S, Zhang S, and Zhang Z. Single cell RNA sequencing of 13 human  
917 tissues identify cell types and receptors of human coronaviruses. *Biochem Biophys*  
918 *Res Commun.* 2020;526(1):135-40.
- 919 20. Zou X, Chen K, Zou J, Han P, Hao J, and Han Z. Single-cell RNA-seq data analysis  
920 on the receptor ACE2 expression reveals the potential risk of different human  
921 organs vulnerable to 2019-nCoV infection. *Front Med.* 2020;14(2):185-92.
- 922 21. Hamming I, Timens W, Bulthuis ML, Lely AT, Navis G, and van Goor H. Tissue  
923 distribution of ACE2 protein, the functional receptor for SARS coronavirus. A first  
924 step in understanding SARS pathogenesis. *J Pathol.* 2004;203(2):631-7.
- 925 22. Muus C, Luecken MD, Eraslan G, Sikkema L, Waghray A, Heimberg G, et al.  
926 Single-cell meta-analysis of SARS-CoV-2 entry genes across tissues and  
927 demographics. *Nat Med.* 2021;27(3):546-59.

- 928 23. Chen J, Neil J, Tan J, Rudraraju R, Mohenska M, Sun Y, et al. An iTSC-derived  
929 placental model of SARS-CoV-2 infection reveals ACE2-dependent susceptibility  
930 in syncytiotrophoblasts. *bioRxiv*. 2021:2021.10.27.465224.
- 931 24. Huang J, Hume AJ, Abo KM, Werder RB, Villacorta-Martin C, Alysandratos KD, et  
932 al. SARS-CoV-2 Infection of Pluripotent Stem Cell-Derived Human Lung Alveolar  
933 Type 2 Cells Elicits a Rapid Epithelial-Intrinsic Inflammatory Response. *Cell Stem*  
934 *Cell*. 2020;27(6):962-73 e7.
- 935 25. Sharma A, Garcia G, Jr., Wang Y, Plummer JT, Morizono K, Arumugaswami V, et  
936 al. Human iPSC-Derived Cardiomyocytes Are Susceptible to SARS-CoV-2  
937 Infection. *Cell Rep Med*. 2020;1(4):100052.
- 938 26. Williams TL, Colzani MT, Macrae RGC, Robinson EL, Bloor S, Greenwood EJD,  
939 et al. Human embryonic stem cell-derived cardiomyocyte platform screens  
940 inhibitors of SARS-CoV-2 infection. *Commun Biol*. 2021;4(1):926.
- 941 27. Anderson DJ, Kaplan DI, Bell KM, Koutsis K, Haynes JM, Mills RJ, et al. NKX2-5  
942 regulates human cardiomyogenesis via a HEY2 dependent transcriptional  
943 network. *Nat Commun*. 2018;9(1):1373.
- 944 28. Lopes LR, Garcia-Hernandez S, Lorenzini M, Futema M, Chumakova O,  
945 Zateyshchikov D, et al. Alpha-protein kinase 3 (ALPK3) truncating variants are a  
946 cause of autosomal dominant hypertrophic cardiomyopathy. *Eur Heart J*.  
947 2021;42(32):3063-73.
- 948 29. Jacob A, Morley M, Hawkins F, McCauley KB, Jean JC, Heins H, et al.  
949 Differentiation of Human Pluripotent Stem Cells into Functional Lung Alveolar  
950 Epithelial Cells. *Cell Stem Cell*. 2017;21(4):472-88 e10.

- 951 30. Elliott DA, Braam SR, Koutsis K, Ng ES, Jenny R, Lagerqvist EL, et al. NKX2-  
952 5(eGFP/w) hESCs for isolation of human cardiac progenitors and cardiomyocytes.  
953 *Nat Methods*. 2011;8(12):1037-40.
- 954 31. Phelan DG, Anderson DJ, Howden SE, Wong RC, Hickey PF, Pope K, et al.  
955 ALPK3-deficient cardiomyocytes generated from patient-derived induced  
956 pluripotent stem cells and mutant human embryonic stem cells display abnormal  
957 calcium handling and establish that ALPK3 deficiency underlies familial  
958 cardiomyopathy. *Eur Heart J*. 2016;37(33):2586-90.
- 959 32. Humphrey SJ, Karayel O, James DE, and Mann M. High-throughput and high-  
960 sensitivity phosphoproteomics with the EasyPhos platform. *Nat Protoc*.  
961 2018;13(9):1897-916.
- 962 33. Yaron TM, Heaton BE, Levy TM, Johnson JL, Jordan TX, Cohen BM, et al. The  
963 FDA-approved drug Alectinib compromises SARS-CoV-2 nucleocapsid  
964 phosphorylation and inhibits viral infection in vitro. *bioRxiv*. 2020.
- 965 34. Zhou P, Yang XL, Wang XG, Hu B, Zhang L, Zhang W, et al. Addendum: A  
966 pneumonia outbreak associated with a new coronavirus of probable bat origin.  
967 *Nature*. 2020;588(7836):E6.
- 968 35. Ziegler CGK, Allon SJ, Nyquist SK, Mbanjo IM, Miao VN, Tzouanas CN, et al.  
969 SARS-CoV-2 Receptor ACE2 Is an Interferon-Stimulated Gene in Human Airway  
970 Epithelial Cells and Is Detected in Specific Cell Subsets across Tissues. *Cell*.  
971 2020;181(5):1016-35 e19.
- 972 36. Marchiano S, Hsiang TY, Khanna A, Higashi T, Whitmore LS, Bargehr J, et al.  
973 SARS-CoV-2 Infects Human Pluripotent Stem Cell-Derived Cardiomyocytes,



- 974           Impairing Electrical and Mechanical Function. *Stem Cell Reports*. 2021;16(3):478-  
975           92.
- 976 37.       Bojkova D, Wagner JUG, Shumliakivska M, Aslan GS, Saleem U, Hansen A, et al.  
977       SARS-CoV-2 infects and induces cytotoxic effects in human cardiomyocytes.  
978       *Cardiovasc Res*. 2020;116(14):2207-15.
- 979 38.       Bailey AL, Dmytrenko O, Greenberg L, Bredemeyer AL, Ma P, Liu J, et al. SARS-  
980       CoV-2 Infects Human Engineered Heart Tissues and Models COVID-19  
981       Myocarditis. *JACC Basic Transl Sci*. 2021;6(4):331-45.
- 982 39.       Montaser M, Lalmanach G, and Mach L. CA-074, but not its methyl ester CA-  
983       074Me, is a selective inhibitor of cathepsin B within living cells. *Biol Chem*.  
984       2002;383(7-8):1305-8.
- 985 40.       Tiwari SK, Wang S, Smith D, Carlin AF, and Rana TM. Revealing Tissue-Specific  
986       SARS-CoV-2 Infection and Host Responses using Human Stem Cell-Derived Lung  
987       and Cerebral Organoids. *Stem Cell Reports*. 2021;16(3):437-45.
- 988 41.       Gunst JD, Staerke NB, Pahus MH, Kristensen LH, Bodilsen J, Lohse N, et al.  
989       Efficacy of the TMPRSS2 inhibitor camostat mesilate in patients hospitalized with  
990       Covid-19-a double-blind randomized controlled trial. *EClinicalMedicine*.  
991       2021;35:100849.
- 992 42.       Ou T, Mou H, Zhang L, Ojha A, Choe H, and Farzan M. Hydroxychloroquine-  
993       mediated inhibition of SARS-CoV-2 entry is attenuated by TMPRSS2. *PLoS*  
994       *Pathog*. 2021;17(1):e1009212.
- 995 43.       Mills RJ, Titmarsh DM, Koenig X, Parker BL, Ryall JG, Quaife-Ryan GA, et al.  
996       Functional screening in human cardiac organoids reveals a metabolic mechanism

- 997 for cardiomyocyte cell cycle arrest. *Proc Natl Acad Sci U S A*.  
998 2017;114(40):E8372-E81.
- 999 44. Li Y, Renner DM, Comar CE, Whelan JN, Reyes HM, Cardenas-Diaz FL, et al.  
1000 SARS-CoV-2 induces double-stranded RNA-mediated innate immune responses  
1001 in respiratory epithelial-derived cells and cardiomyocytes. *Proc Natl Acad Sci U S*  
1002 *A*. 2021;118(16).
- 1003 45. Sampaio NG, Chauveau L, Hertzog J, Bridgeman A, Fowler G, Moonen JP, et al.  
1004 The RNA sensor MDA5 detects SARS-CoV-2 infection. *Sci Rep*.  
1005 2021;11(1):13638.
- 1006 46. Shemesh M, Aktepe TE, Deerain JM, McAuley JL, Audsley MD, David CT, et al.  
1007 SARS-CoV-2 suppresses IFNbeta production mediated by NSP1, 5, 6, 15, ORF6  
1008 and ORF7b but does not suppress the effects of added interferon. *PLoS Pathog*.  
1009 2021;17(8):e1009800.
- 1010 47. Lei X, Dong X, Ma R, Wang W, Xiao X, Tian Z, et al. Activation and evasion of type  
1011 I interferon responses by SARS-CoV-2. *Nat Commun*. 2020;11(1):3810.
- 1012 48. Xia H, Cao Z, Xie X, Zhang X, Chen JY, Wang H, et al. Evasion of Type I Interferon  
1013 by SARS-CoV-2. *Cell Rep*. 2020;33(1):108234.
- 1014 49. Uhlen M, Fagerberg L, Hallstrom BM, Lindskog C, Oksvold P, Mardinoglu A, et al.  
1015 Proteomics. Tissue-based map of the human proteome. *Science*.  
1016 2015;347(6220):1260419.
- 1017 50. Zhang Q, Bastard P, Liu Z, Le Pen J, Moncada-Velez M, Chen J, et al. Inborn  
1018 errors of type I IFN immunity in patients with life-threatening COVID-19. *Science*.  
1019 2020;370(6515).

- 1020 51. Pruijssers AJ, George AS, Schafer A, Leist SR, Gralinski LE, Dinnon KH, 3rd, et  
1021 al. Remdesivir Inhibits SARS-CoV-2 in Human Lung Cells and Chimeric SARS-  
1022 CoV Expressing the SARS-CoV-2 RNA Polymerase in Mice. *Cell Rep.*  
1023 2020;32(3):107940.
- 1024 52. Bouhaddou M, Memon D, Meyer B, White KM, Rezelj VV, Correa Marrero M, et al.  
1025 The Global Phosphorylation Landscape of SARS-CoV-2 Infection. *Cell.*  
1026 2020;182(3):685-712 e19.
- 1027 53. Tohyama S, Hattori F, Sano M, Hishiki T, Nagahata Y, Matsuura T, et al. Distinct  
1028 metabolic flow enables large-scale purification of mouse and human pluripotent  
1029 stem cell-derived cardiomyocytes. *Cell Stem Cell.* 2013;12(1):127-37.
- 1030 54. Howe KL, Achuthan P, Allen J, Allen J, Alvarez-Jarreta J, Amode MR, et al.  
1031 Ensembl 2021. *Nucleic Acids Res.* 2021;49(D1):D884-D91.
- 1032 55. Dobin A, Davis CA, Schlesinger F, Drenkow J, Zaleski C, Jha S, et al. STAR:  
1033 ultrafast universal RNA-seq aligner. *Bioinformatics.* 2013;29(1):15-21.
- 1034 56. Liao Y, Smyth GK, and Shi W. featureCounts: an efficient general purpose  
1035 program for assigning sequence reads to genomic features. *Bioinformatics.*  
1036 2014;30(7):923-30.
- 1037 57. Robinson MD, McCarthy DJ, and Smyth GK. edgeR: a Bioconductor package for  
1038 differential expression analysis of digital gene expression data. *Bioinformatics.*  
1039 2010;26(1):139-40.
- 1040 58. Zhou Y, Zhou B, Pache L, Chang M, Khodabakhshi AH, Tanaseichuk O, et al.  
1041 Metascape provides a biologist-oriented resource for the analysis of systems-level  
1042 datasets. *Nat Commun.* 2019;10(1):1523.

1043 **Figure Legends**

1044

1045 **Figure 1. SARS-CoV-2 infection of cardiac and lung AT2 cells is mediated by ACE2.**

1046 (A) Schematic of cell differentiation and infection protocols. (B) Viral titres and genome  
1047 copies in SARS-CoV-2 (VIC01) infected Vero, lung AT2 (H9) and cardiac (NKX2-5)  
1048 culture supernatants. (C) Representative fluorescent confocal microscopy images of  
1049 dsRNA (green) expression in VIC01 infected lung AT2 (SFTPC-positive) and cardiac  
1050 (cTNT-positive) cells at 3 dpi. Titres in supernatants from cardiac and lung AT2 cells  
1051 infected with VIC01 (WT) compared to cells infected with Alpha, Beta, Gamma and Delta  
1052 variants (D) or Omicron (BA.1 and BA.2) variants (E).

1053

1054 **Figure 2. SARS-CoV-2 entry and antiviral sensitivity is different between lung AT2**

1055 **and cardiac cells.** (A) Virus titer in supernatants from SARS-CoV-2 (VIC01) infected H9-  
1056 derived WT and *ACE2* KO cardiac and lung AT2 cells. (B) Virus titer at 3 dpi in  
1057 supernatants from lung AT2 (H9) and cardiac cells (NKX2-5) treated with two  $\alpha$ -ACE2  
1058 antibodies or a human IgG1 isotype control before infection with SARS-CoV-2. (C) Virus  
1059 titer at 3 dpi in supernatant from cardiac cells (red triangles) and lung AT2 cells (blue  
1060 squares) infected with SARS-CoV-2 (VIC01) in the presence of Camostat, CA-074 or  
1061 DMSO (vehicle control). Virus titres and genome copies at 3 dpi in supernatant from Vero,  
1062 lung AT2 and cardiac cells infected with SARS-CoV-2 VIC01 in the presence of various  
1063 concentrations of Remdesivir (D) or NHC (E).

1064

1065 **Figure 3. Cardiac, but not lung AT2 cells, have a robust interferon signature**  
1066 **following SARS-CoV-2 infection.** (A) Principal Component Analysis (PCA) plot of  
1067 uninfected (mock) and SARS-CoV-2 infected (virus) cardiac and lung AT2 cells at 1 and  
1068 3 dpi. (B) Venn diagram depicting the number of overlapping and unique differentially  
1069 expressed genes compared to mock-infected. (C) Top representative WikiPathway (WP)  
1070 terms of the enriched genes. Circle size is proportional to the number of genes that  
1071 matched the pathway and color represents the LogP value as calculated by Metascape.  
1072 (D) Heat map in Log<sub>2</sub> fold change (FC) of representative interferon genes (compared to  
1073 representative mock-infected samples at 1 dpi) separated by type as defined by  
1074 WikiPathways. Columns on the right show the concordance between direction of fold  
1075 change of RNAseq data and the LegendPlex/Taqman assays. For 1 dpi and 3 dpi, 3 lung  
1076 samples and 2 cardiac samples were analyzed per group (mock, virus). (E) Cytokine  
1077 concentrations in the supernatants of mock and SARS-CoV-2 infected cardiac and lung  
1078 AT2 cells at 3 dpi.

1079

1080 **Figure 4. SARS-CoV2 infection alters different signaling networks in heart and lung**  
1081 **organoids.** (A) Schematic of phosphoproteomics workflow. (B) Number of  
1082 phosphorylated peptides, sites and proteins found in at 3 samples. (C) PCA plot of  
1083 median-normalized phosphoproteome replicates from uninfected (mock) and SARS-CoV-  
1084 2 infected (CoV) cardiac and lung AT2 cells at 18 and 24 hours post infection. Number  
1085 of significantly ( $P_{adj} < 0.05$ ,  $FC > 1.5$ ) regulated phosphopeptides per timepoint (D) and  
1086 their overlap (E) between cell types. Top 5 predicted drivers following SARS-CoV-2  
1087 infection in lung and cardiac cells (F) and in lung cells (G) at 72h post-infection. Adjusted

1088 P-values (P.adj) are calculated based on the computation of Z-score probability  
1089 distributions of a molecule to be a driver and adjusted using the Benjamini and Hochberg  
1090 algorithm. (H) GO cellular components enriched in at least one condition ( $P < 0.05$ ) that  
1091 are related to endosomes. (I) Kinases with enriched substrates, which were selected for  
1092 targeting. (J) Abundance of the PKC substrate MARCKS S170. (K) Abundance of the  
1093 SRPK1 substrate SARS-CoV2 nucleocapsid protein S206.

1094

1095 **Figure 5. Efficacy of kinase inhibitors against SARS-CoV-2 replication varies**  
1096 **between Lung AT2 and cardiac cells.** Cell viability (% relative to Vehicle control, black  
1097 lines) and inhibition of SARS-CoV-2 growth (% relative to Vehicle control) in the presence  
1098 of CDK (A), CHK (B), PKC (C) and, SRPK1 (D) inhibitors in lung AT2 cells (H9) and  
1099 cardiac cells (NKX2-5) at 2 dpi. Dotted black lines indicate 50% virus inhibition or cell  
1100 viability.

1101

1102 **Figure S1.** (A) Immunofluorescence images of lung culture from 3D organoids into 2D  
1103 (AQP5, White; NKX2.1, Green; ACE2, Red). Heatmap analysis of lung-related (B) and  
1104 cardiac-related (C) gene sets. (D) Viral titres and genome copies in supernatant from  
1105 cardiac cells (ALK3-KO) infected with SARS-CoV-2 (VIC01). Viral genomes in  
1106 supernatants from cardiac and lung AT2 cells infected with VIC01 (WT) compared to cells  
1107 infected with Alpha, Beta, Gamma and Delta variants (E) or Omicron (BA.1 and BA.2)  
1108 variants (F).

1109

1110 **Figure S2.** (A) PCR for *ACE2* in both the H9 and MCRIi010-A *ACE2* WT and KO clones.  
1111 (B) Sanger sequencing of MCRIi010-A and H9 *ACE2* KO clones. (C) *ACE2* expression in  
1112 ESCs/iPSCs and differentiated cardiac and lung AT2 cells. GAPDH was used as a  
1113 loading control. (D) Relative expression of *ACE2* in the H9 *ACE2* KO-derived cardiac and  
1114 lung AT2 cells compared to lung AT2 WT. (E) Representative flow cytometry plot of  
1115 proteins associated with pluripotency (CD9, EPCAM, SSEA4) in the H9 *ACE2* KO line.  
1116 (F) Representative flow cytometry plot of cardiac proteins (c-TnT,  $\alpha$ -actinin) following  
1117 differentiation in H9 WT and *ACE2* KO lines. (G) Virus titer in supernatant from SARS-  
1118 CoV-2 infected *ACE2* KO and WT MCRIi010-A-derived cardiac cells. (H) Representative  
1119 fluorescent confocal microscopy images of *ACE2* (red) and dsRNA (green) expression in  
1120 WT and *ACE2* KO cardiac (cTNT-positive) and lung AT2 (SFTPC-positive) cells (H9 and  
1121 MCRIi010-A). Scale bars are highlighted on each panel.

1122

1123 **Figure S3.** (A) Heat map in log<sub>2</sub> counts per million (CPM) representing the gene  
1124 expression of *ACE2*, *TMPRSS2* and Cathepsin L (CTSL) in uninfected and SARS-CoV-  
1125 2-infected iPSC-derived lung AT2 and cardiac cells at 1 and 3 dpi. (B) Relative expression  
1126 of *ACE2*, *TMPRSS2* and Cathepsin L in iPSC-derived cardiac and lung AT2 *ACE2* KO  
1127 cells compared to lung AT2 WT. (C) Viral genome copies in supernatants from cardiac  
1128 (red triangles) and lung AT2 (blue squares) cells at 3 dpi infected with SARS-CoV-2 in  
1129 the presence of Camostat, CA-074 Me or DMSO.

1130

1131 **Figure S4.** (A) Cell viability in uninfected Vero, lung AT2 and cardiac cells following 3  
1132 days culture in the presence of Remdesivir or NHC at the indicated concentrations. (B)

1133 Virus titer and viral genome copies in the supernatant at 3 dpi in Vero, lung AT2, NKX2-  
1134 5 cardiac and ALP3K KO cells infected with SARS-CoV-2 in the presence of 1 $\mu$ M or 10 $\mu$ M  
1135 Favipiravir, Chloroquine, Tizoxanide or Piperaquine. Cell viability of uninfected cells after  
1136 3 days culture in the presence of the above drugs.

1137

1138 **Figure S5.** (A) Extended heat map in Log2 fold change (FC) of representative interferon  
1139 genes (compared to representative mock-infected samples at 1 dpi) separated by type as  
1140 defined by WikiPathways. (B) Extended Plot of top enriched WP terms. (C) Relative  
1141 expression of IFN pathway genes compared to mock-infected cells. (D) Gene network  
1142 diagram of the GO Term 'response to interferon gamma' (GO:0034341). Node colors are  
1143 log2 fold change of the gene in the respective tissue type.

1144

1145 **Figure S6.** (A) All GO cellular components enriched in at least one condition ( $P < 0.05$ ).  
1146 (B) All kinases with reported substrates enriched in at least one condition ( $P < 0.05$ ).

1147

1148 **Figure S7.** Cell viability (% relative to Vehicle control, black lines) and inhibition of SARS-  
1149 CoV-2 growth (% relative to Vehicle control) in the presence of indicated compounds in  
1150 H9 cardiac cells (A), H9 lung AT2 cells (B) and NKX2-5 cardiac (C) cells at 3 dpi.

1151

1152

1153

1154

1155



**Table S1.** List of sites phosphorylated on SARS-CoV-2 proteins in infected cardiac and lung cells

| <b>Protein</b> | <b>Phosphorylation Site</b> | <b>Lung</b> | <b>Cardiac</b> |
|----------------|-----------------------------|-------------|----------------|
| ORF1a          | S2644                       | +           | +              |
| Spike          | S1261                       | +           | +              |
| Membrane       | S213                        | +           | +              |
| Membrane       | S214                        | +           | +              |
| Membrane       | T208                        | -           | +              |
| Membrane       | S212                        | -           | +              |
| Nucleocapsid   | S2                          | +           | +              |
| Nucleocapsid   | S21                         | +           | +              |
| Nucleocapsid   | S23                         | +           | +              |
| Nucleocapsid   | T24                         | +           | +              |
| Nucleocapsid   | S26                         | +           | +              |
| Nucleocapsid   | T76                         | -           | -              |
| Nucleocapsid   | T79                         | +           | +              |
| Nucleocapsid   | T166                        | +           | +              |
| Nucleocapsid   | Y172                        | +           | -              |
| Nucleocapsid   | S176                        | +           | +              |
| Nucleocapsid   | S180                        | +           | +              |
| Nucleocapsid   | S183                        | -           | -              |
| Nucleocapsid   | S184                        | +           | +              |
| Nucleocapsid   | S186                        | -           | -              |
| Nucleocapsid   | S188                        | -           | -              |
| Nucleocapsid   | S194                        | +           | +              |
| Nucleocapsid   | S197                        | +           | +              |
| Nucleocapsid   | T198                        | +           | +              |
| Nucleocapsid   | S201                        | +           | +              |
| Nucleocapsid   | S202                        | +           | +              |
| Nucleocapsid   | T205                        | +           | +              |
| Nucleocapsid   | S206                        | +           | +              |
| Nucleocapsid   | T245                        | +           | +              |
| Nucleocapsid   | T379                        | +           | +              |
| Nucleocapsid   | T391                        | +           | +              |
| Nucleocapsid   | T393                        | +           | +              |
| Nucleocapsid   | S404                        | +           | +              |
| Nucleocapsid   | S412                        | +           | +              |
| Nucleocapsid   | S416                        | +           | +              |
| ORF9b          | S50                         | +           | +              |

**Table S2.** Compounds for antiviral testing from MedChemExpress

| <b>Compound</b>                    | <b>Target Kinase(s)</b>                | <b>Catalogue</b> |
|------------------------------------|----------------------------------------|------------------|
| Abemaciclib                        | CDK4 and CDK6                          | HY-16297A        |
| Alectinib (CH5424802)              | SRPK1                                  | HY-13011         |
| AZD1080                            | GSK-3                                  | HY-13862         |
| Bisindolylmaleimide I              | PKC                                    | HY-13867         |
| CCT241533 hydrochloride            | CHK2                                   | HY-14715B        |
| CCT251545                          | CDK8, CDK19 and WNT                    | HY-12681         |
| Dinaciclib                         | CDK2, CDK5, CDK1, and CDK9             | HY-10492         |
| Flavopiradol                       | CDK1, CDK2, CDK4                       | HY-10005         |
| GW788388                           | ALK5 and TGF- $\beta$ type II receptor | HY-10326         |
| Palbociclib hydrochloride          | CDK and CDK6                           | HY-50767A        |
| R-10015                            | LIMK                                   | HY-120097        |
| R406 free base                     | Syk/FLT3                               | HY-11108         |
| Samuraciclib hydrochloride hydrate | CDK7                                   | HY-103712B       |
| SNS-032                            | CDK2, CDK7, and CDK9                   | HY-10008         |
| SPHINX31                           | SRPK1                                  | HY-117661        |
| Trilaciclib hydrochloride          | CDK4 and CDK6                          | HY-101467A       |

ALK5: Activin-like kinase 5, CDK: Cyclin dependent kinase, CHK: Checkpoint, FLT3: FMS-like tyrosine kinase 3, GSK-3: Glycogen synthase kinase 3, LIMK: LIMK domain kinase, PKC: Protein kinase C, SRPK1: Serine/arginine-rich protein-specific kinase, TGF- $\beta$ : Transforming growth factor beta.

**Table S3.** TaqMan Probes for qPCR

| <b>Gene</b>    | <b>Target Kinase(s)</b>      |
|----------------|------------------------------|
| GAPDH          | Hs02758991_g1, Hs02786624_g1 |
| TMPRSS2        | Hs00237175_m1                |
| ACE2           | Hs01085333_m1                |
| CTSL           | Hs00964650_m1                |
| EIF4E          | Hs00854166_g1                |
| IFN- $\beta$ 1 | Hs01077958_s1                |
| IL-6           | Hs00174131_m1                |
| IRF9           | Hs00196051_m1                |
| IRS1           | Hs00178563_m1                |
| STAT1          | Hs01013996_m1                |
| STAT1          | Hs01013116_g1                |
| IRS2           | Hs00275843_s1                |
| PRKCD          | Hs01090047_m1                |
| SOCS1          | Hs00705164_s1                |
| REL            | Hs00968440_m1                |
| MAP2K6         | Hs00992389_m1                |
| IFITM3         | Hs03057129_s1                |
| OAS2           | Hs00942643_m1                |

**Figure 1.**

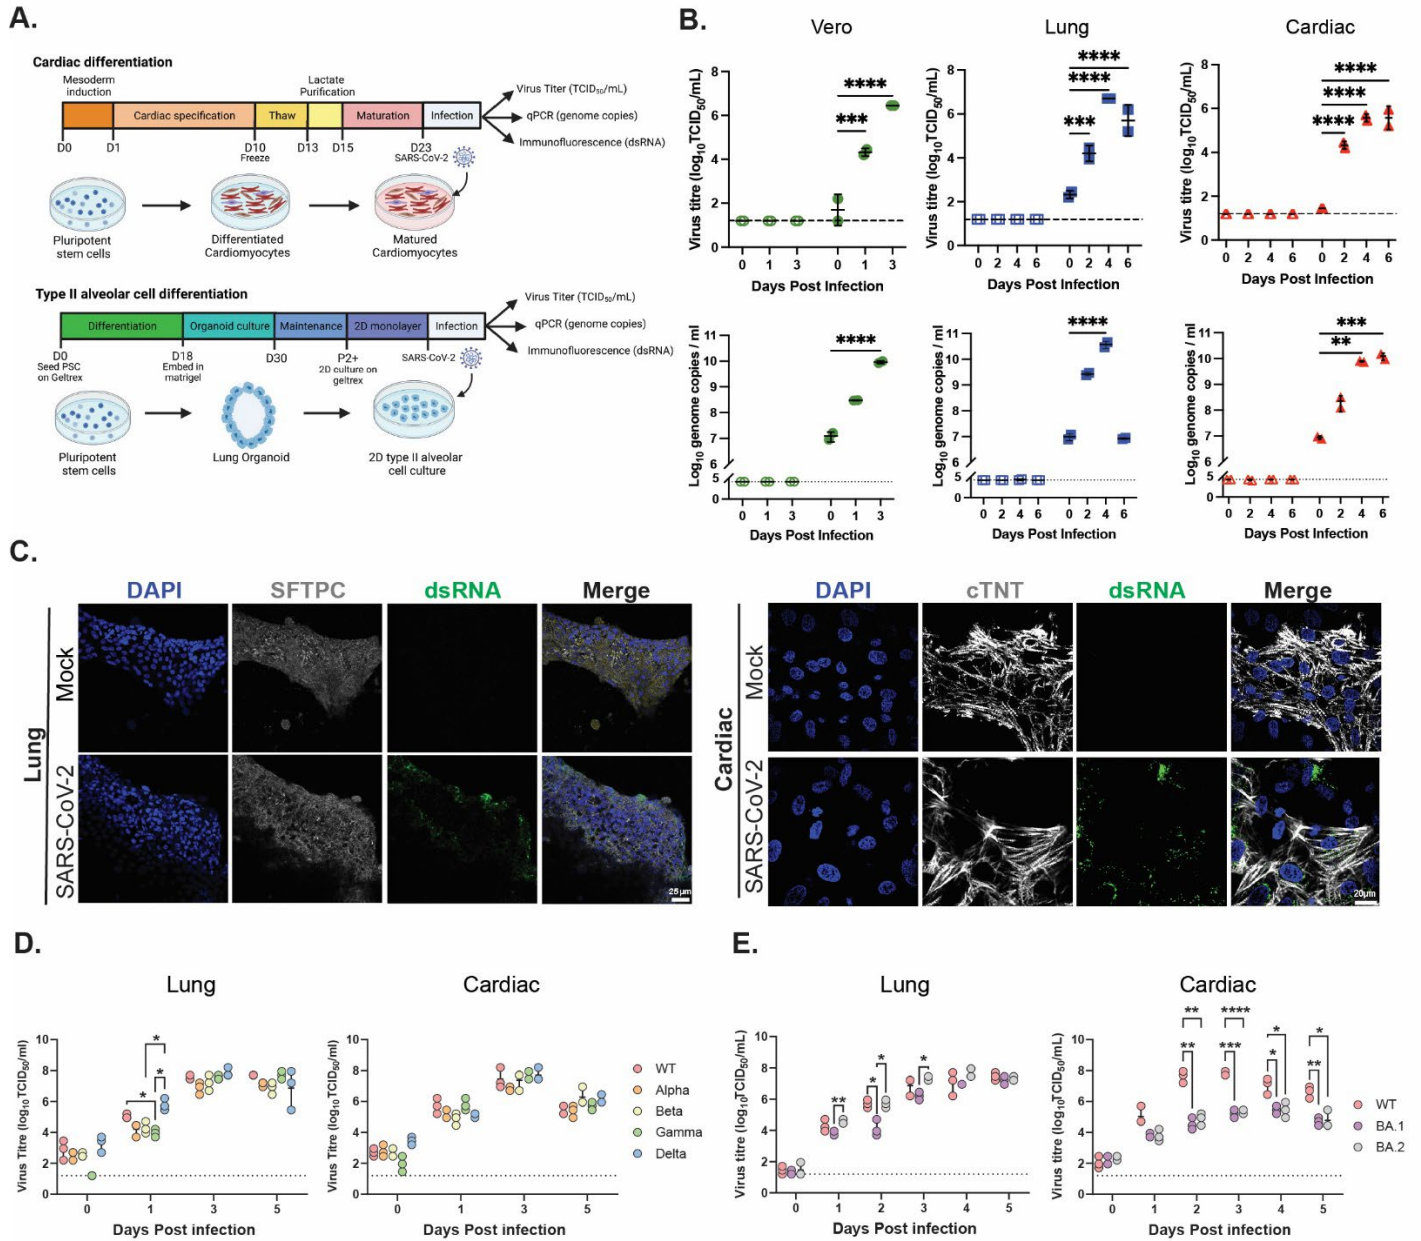

**Figure 2.**

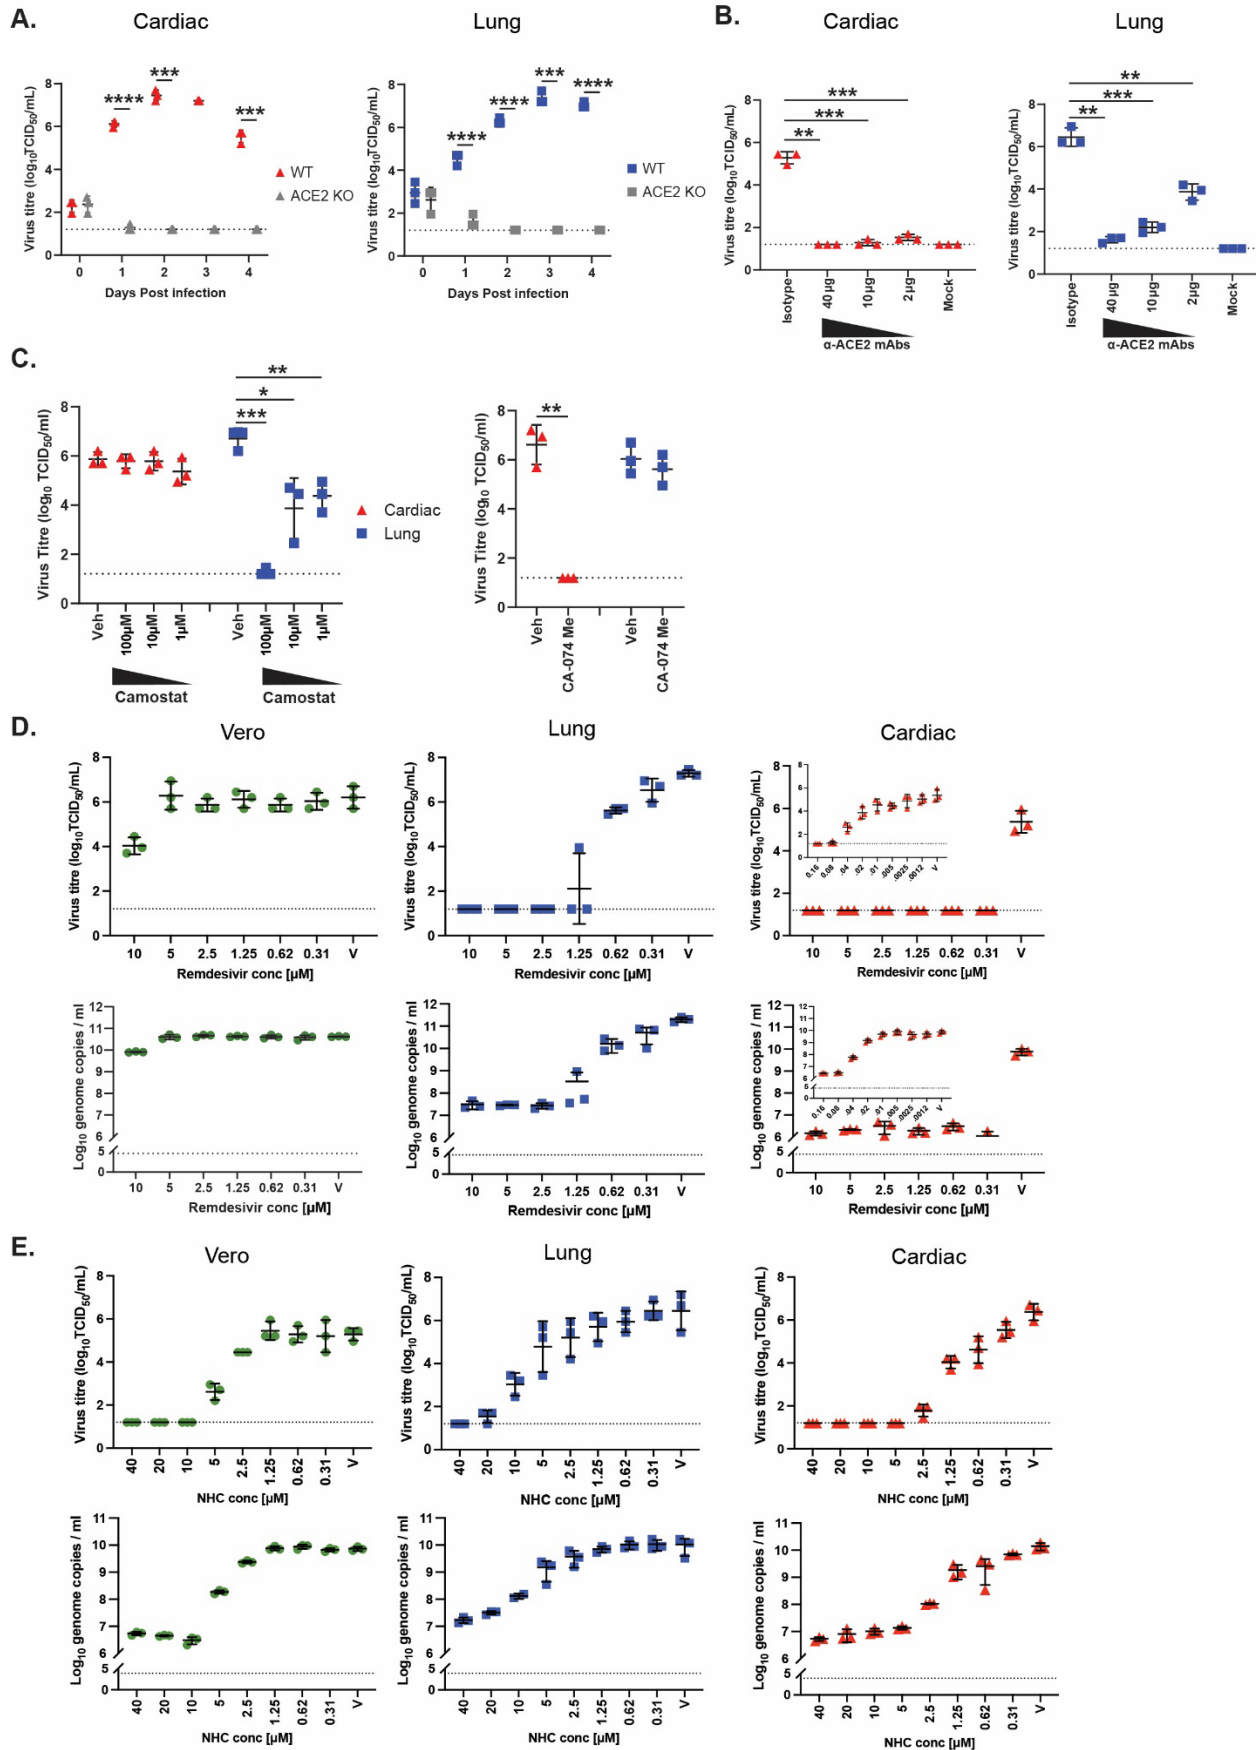

**Figure 3.**

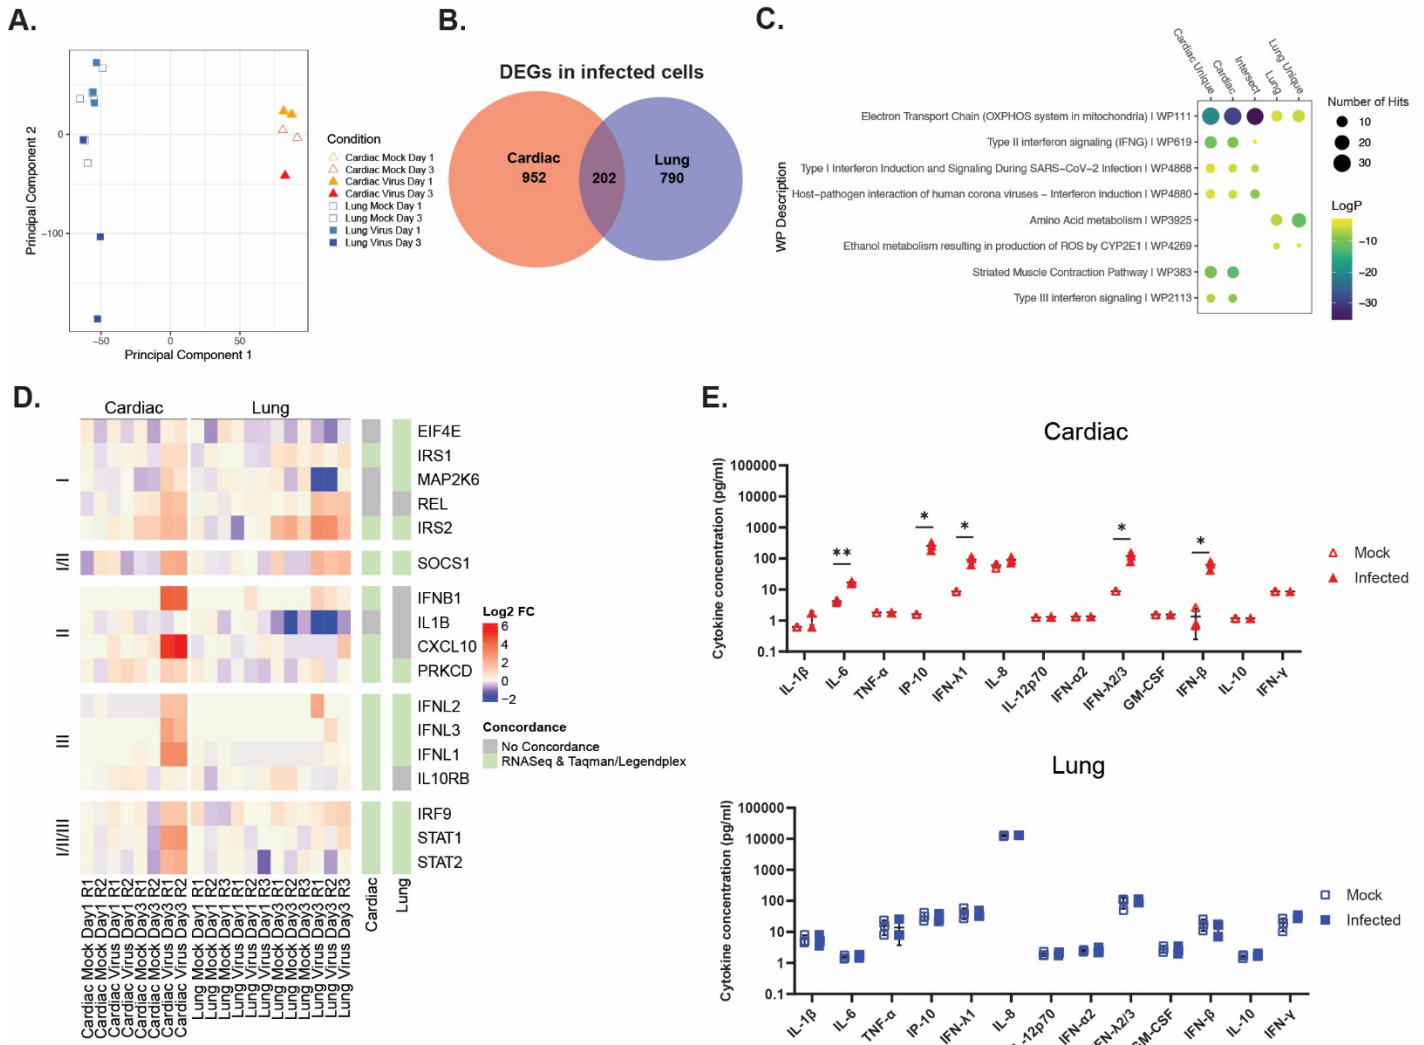



**Figure 4.**

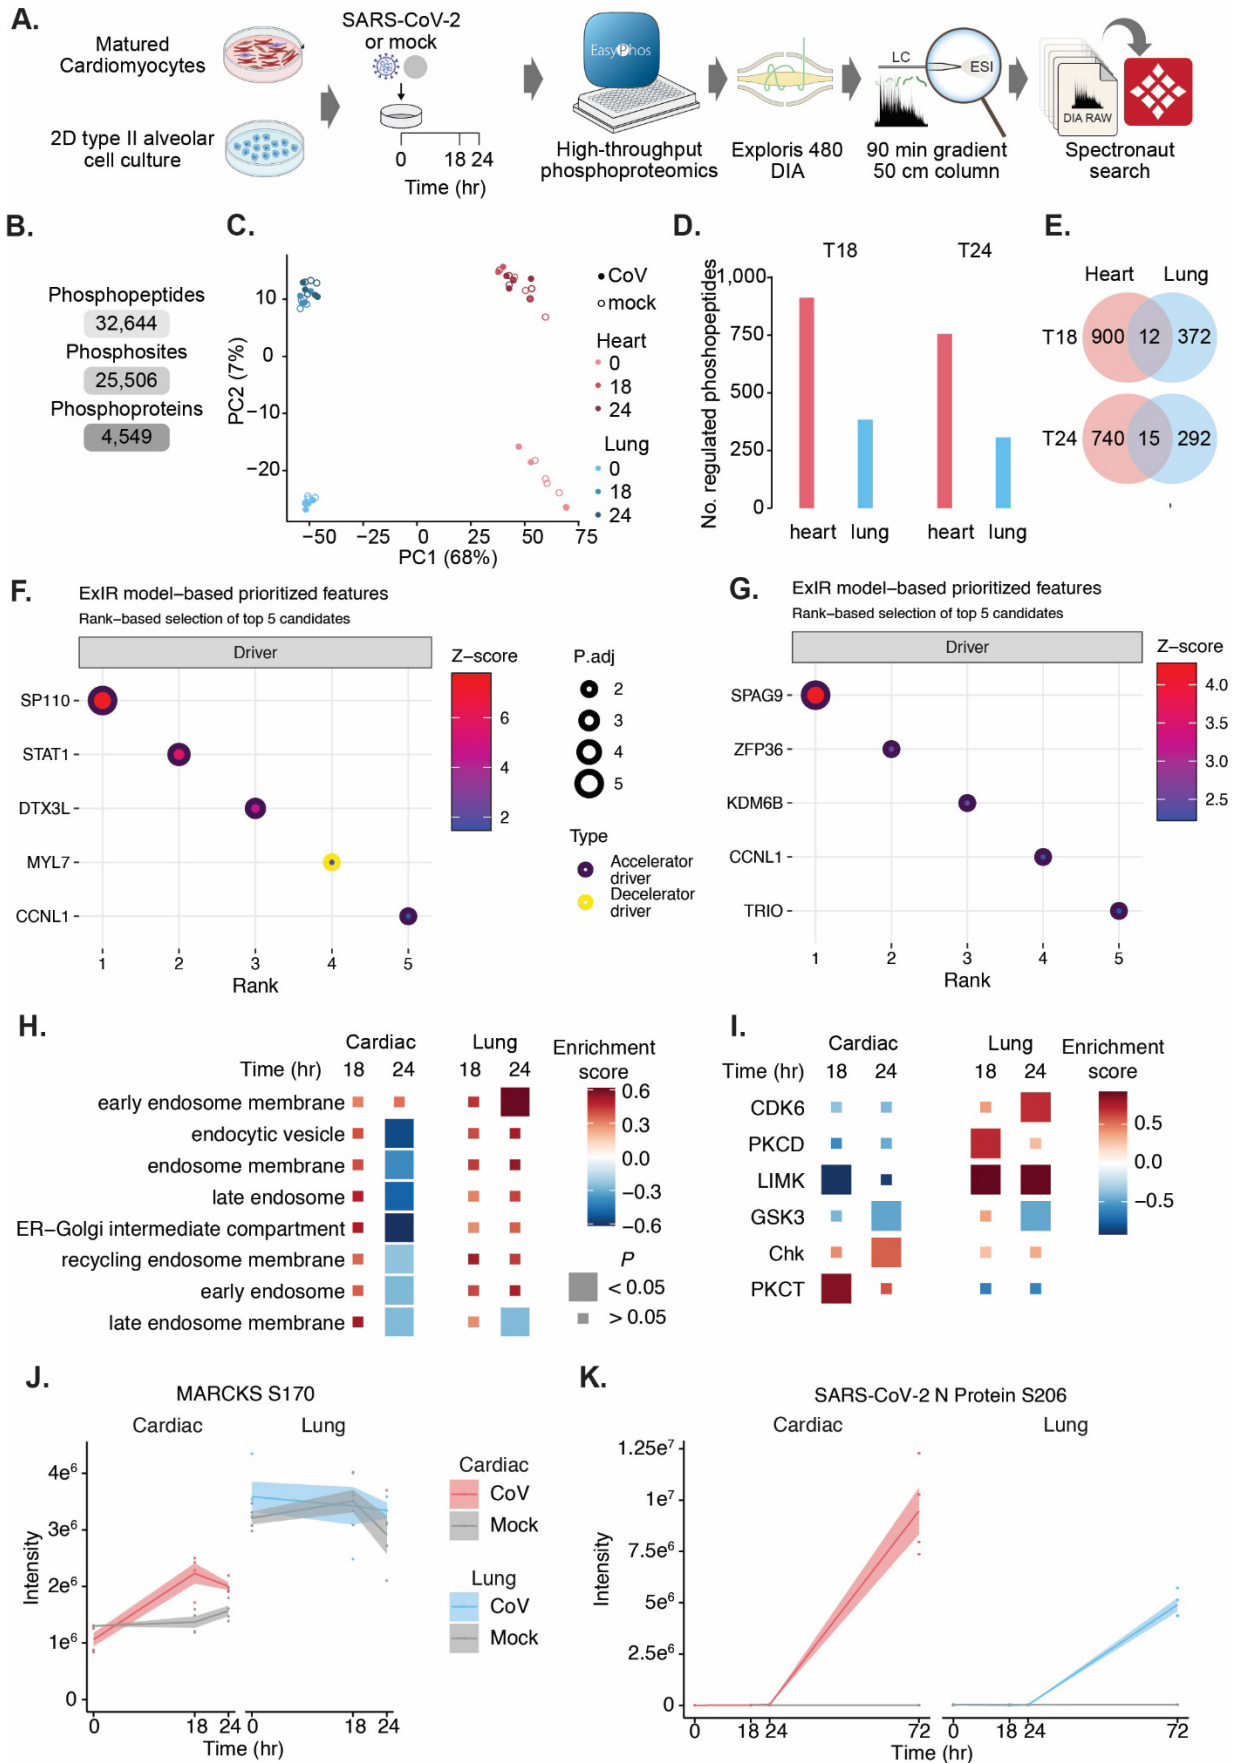

**Figure 5.**

**A.**

**CDK Inhibitors**

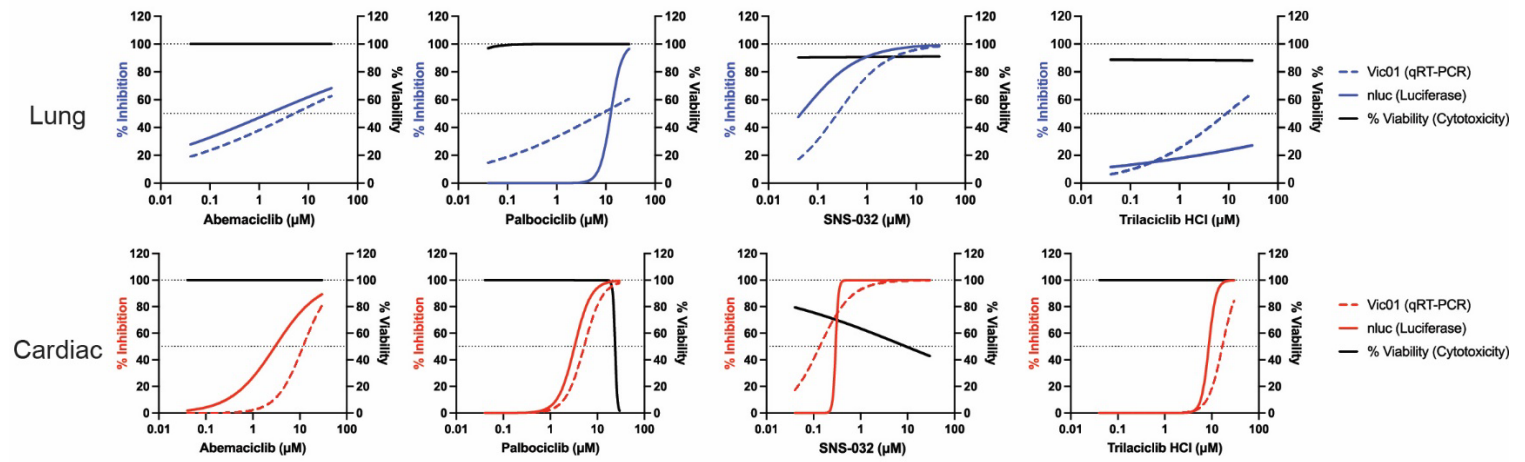

**B.**

**Chk Inhibitor**

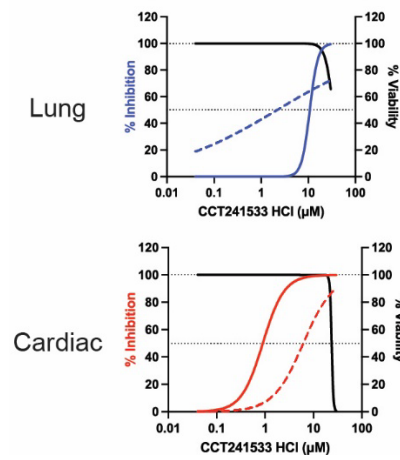

**C.**

**PKC Inhibitor**

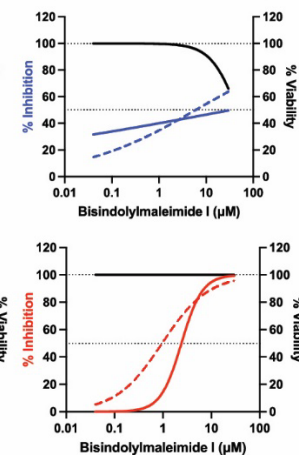

**D.**

**SRPK1 Inhibitors**

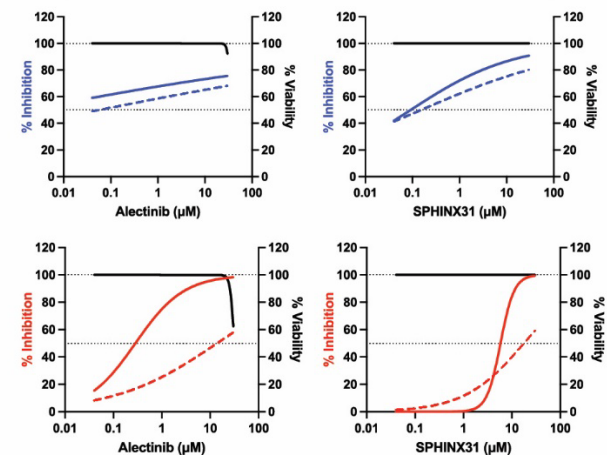



## Figure S1

A.

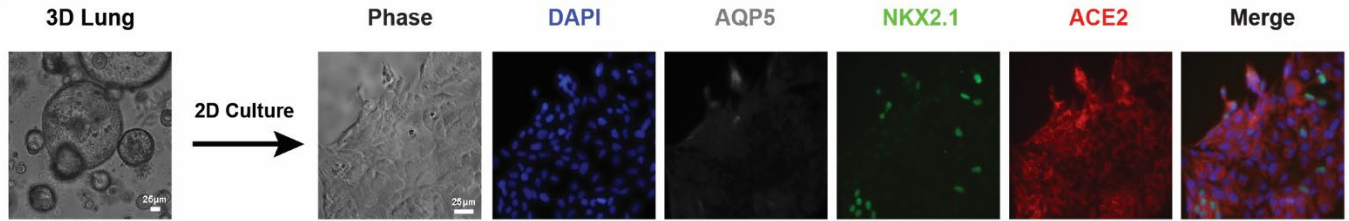

B.

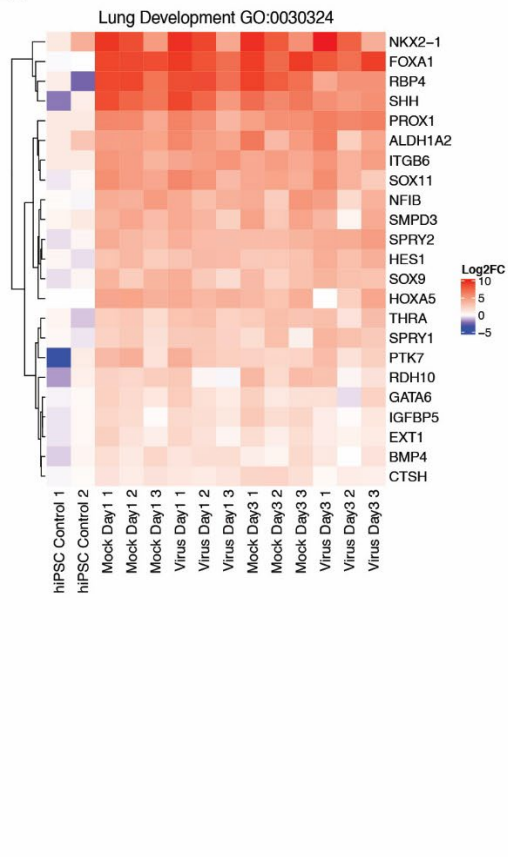

C.

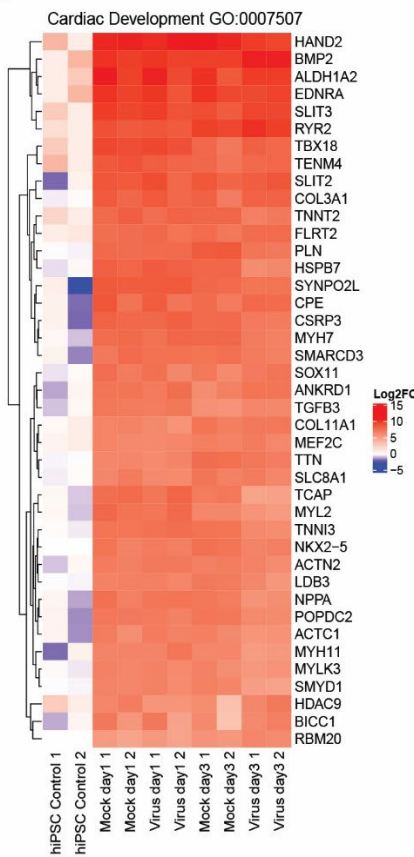

D.

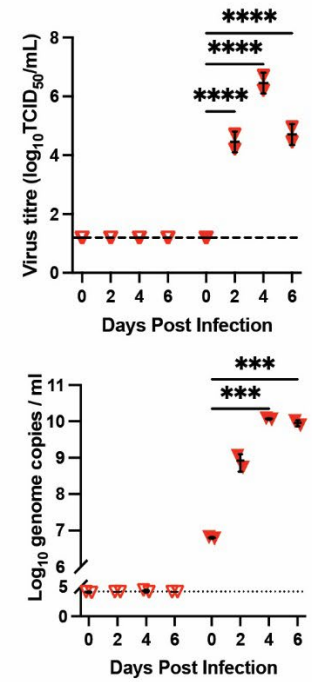

E.

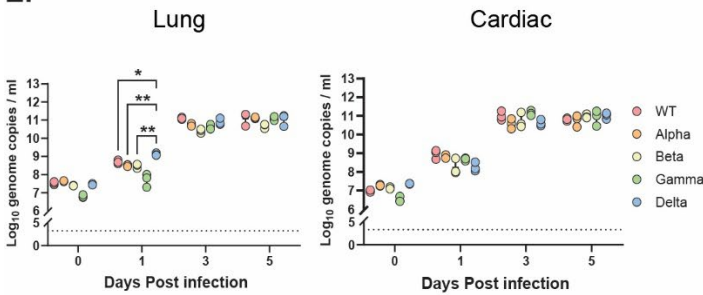

F.

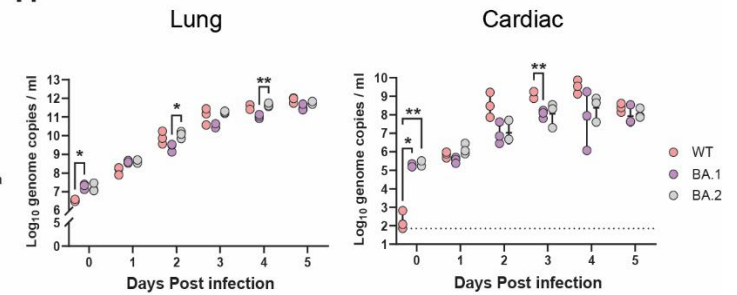

**Figure S2**

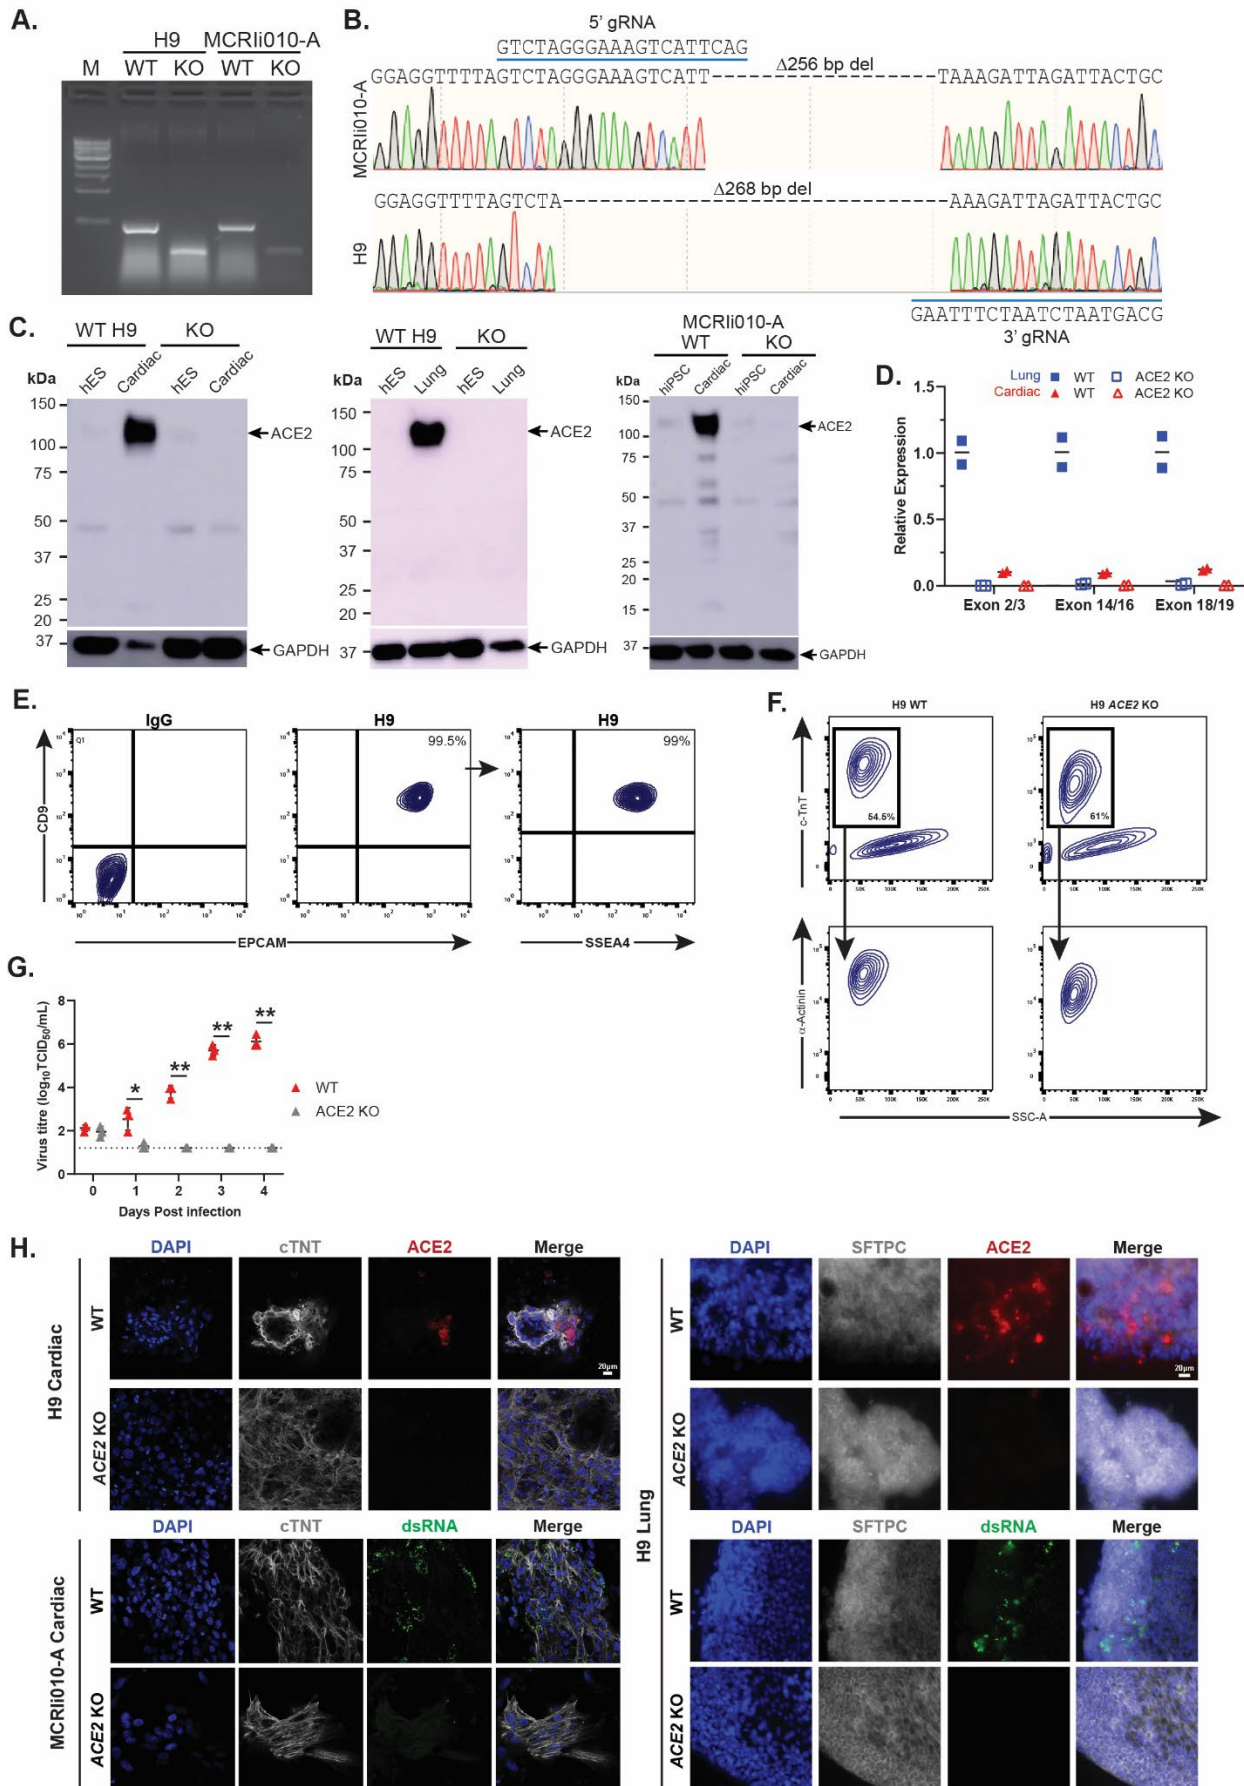

## Figure S3

A.

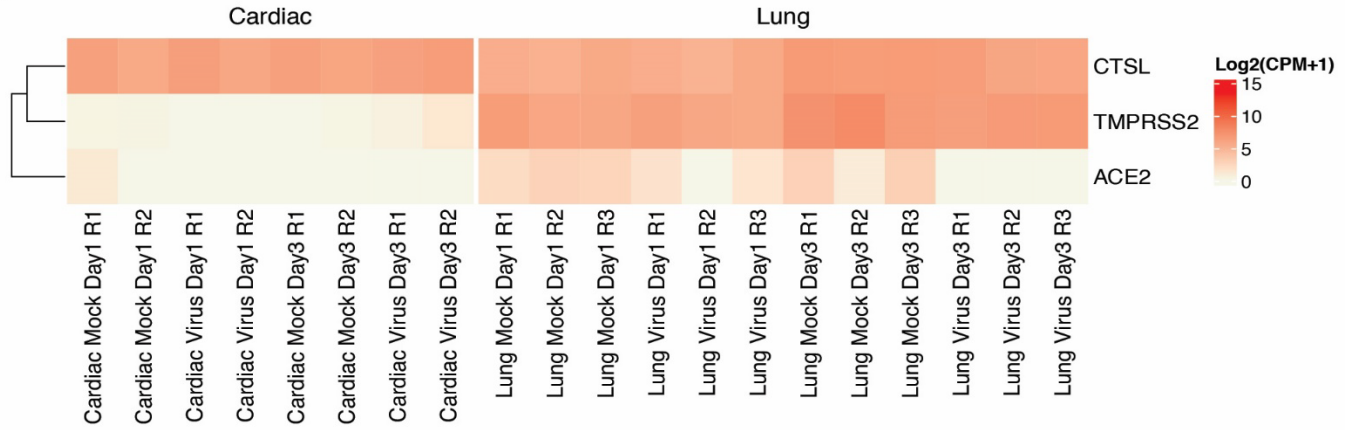

B.

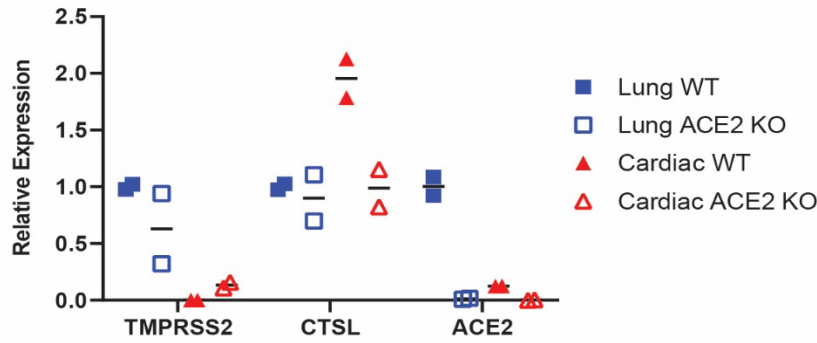

C.

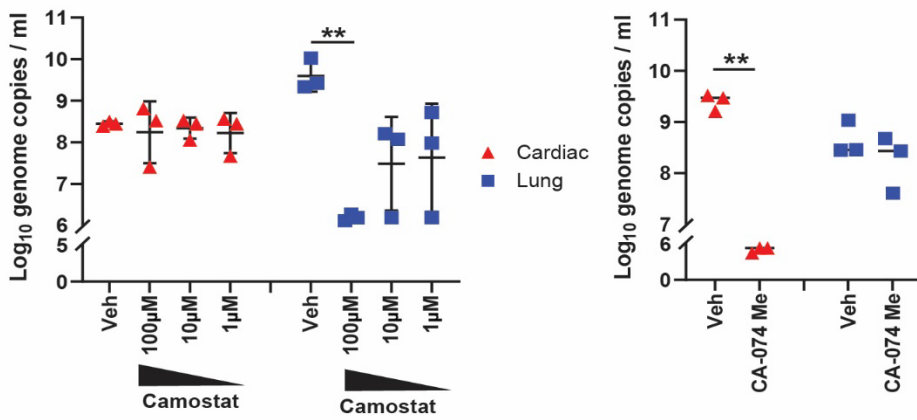

## Figure S4

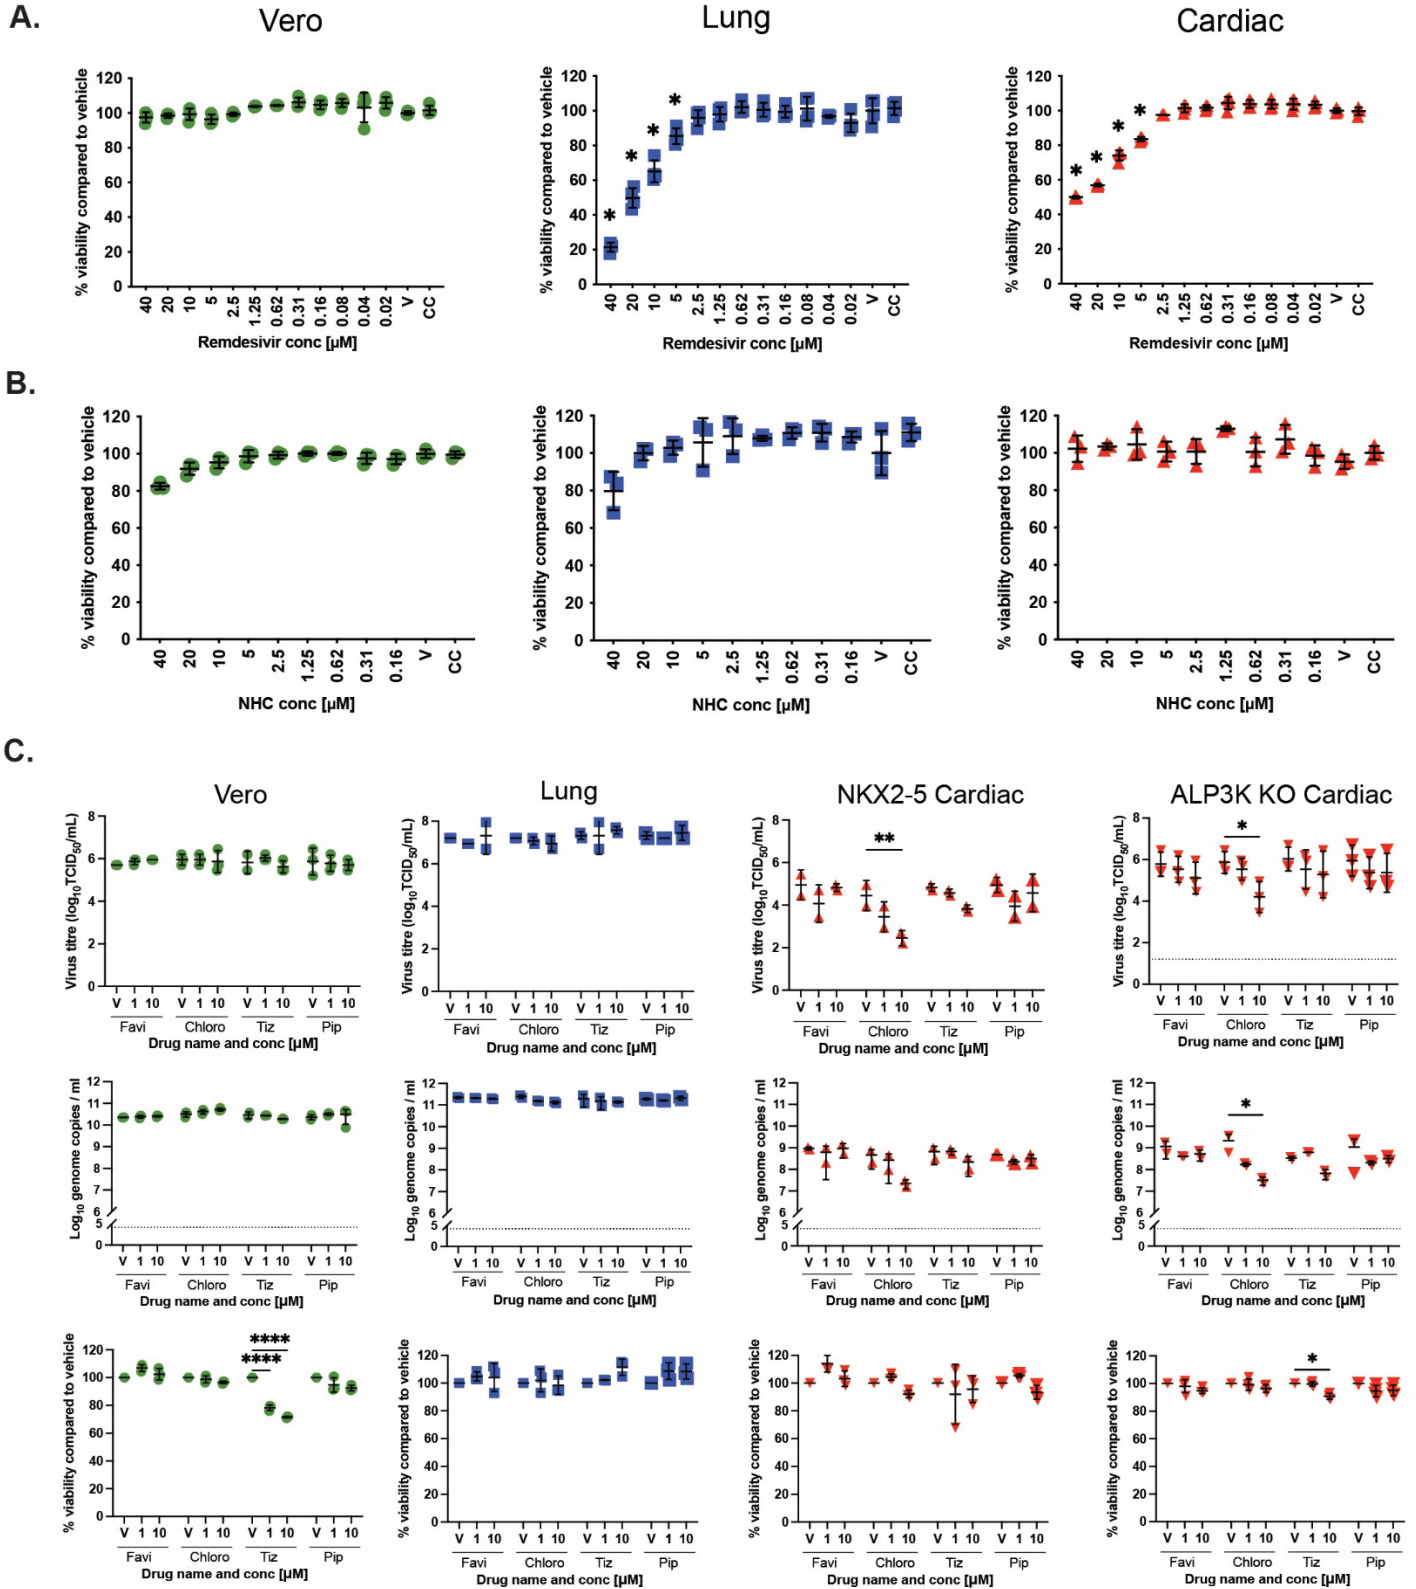



Figure S5

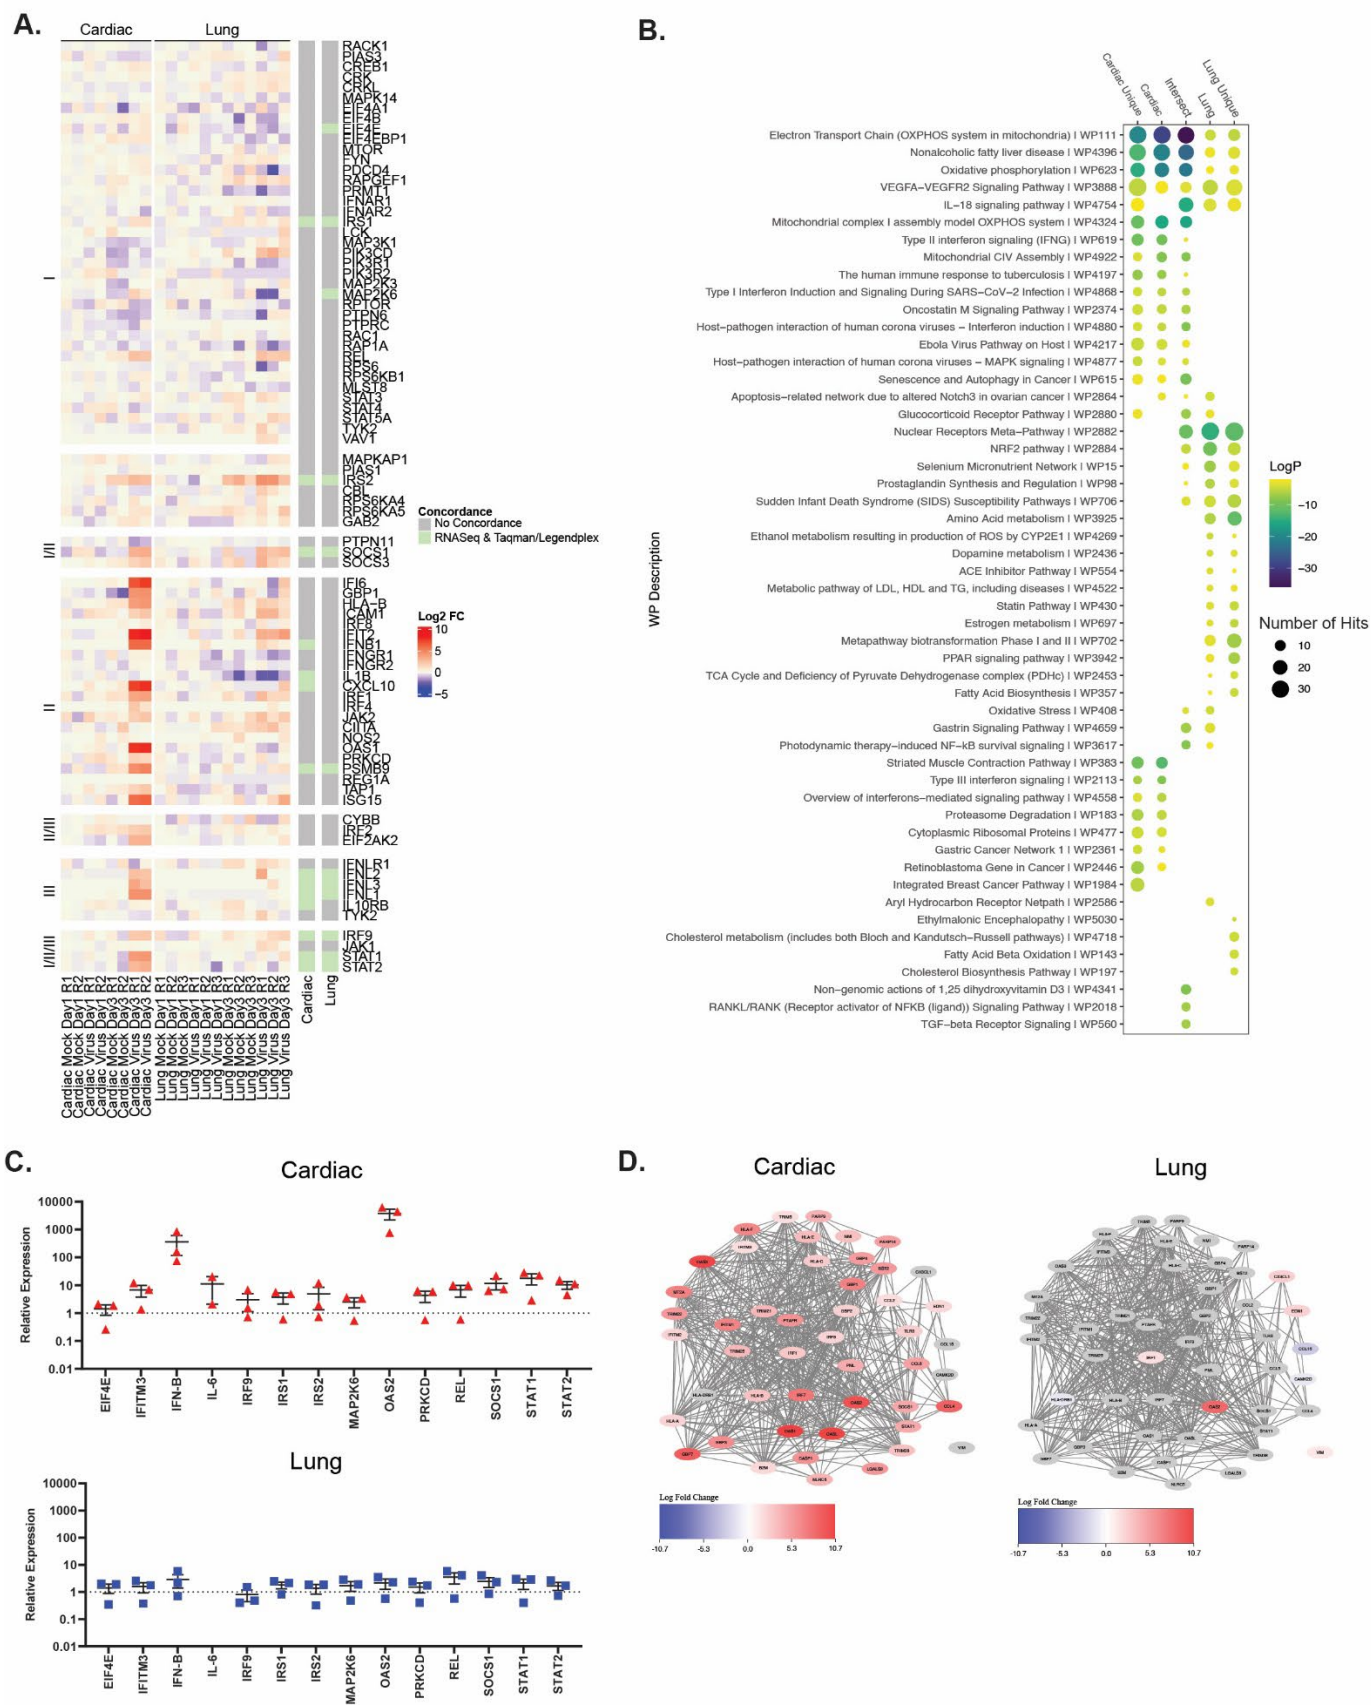

**Figure S6**

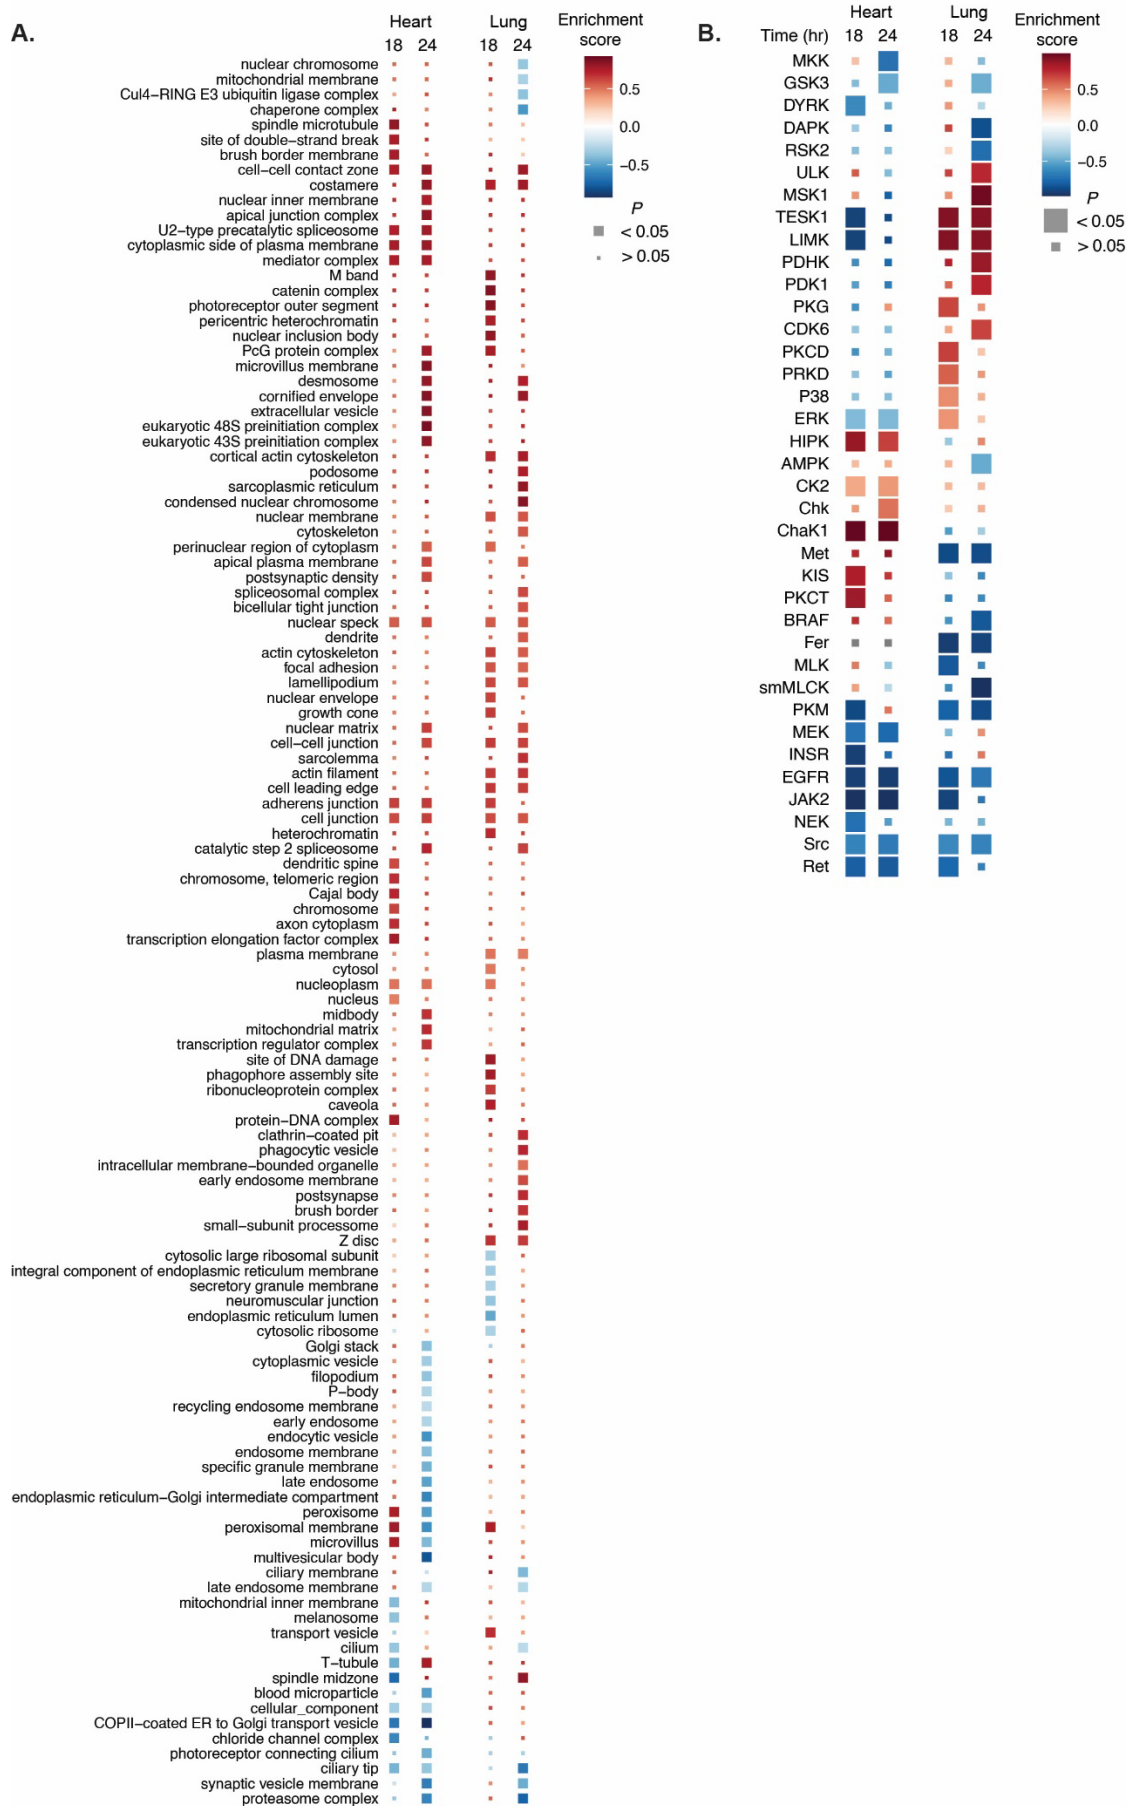

## Figure S7

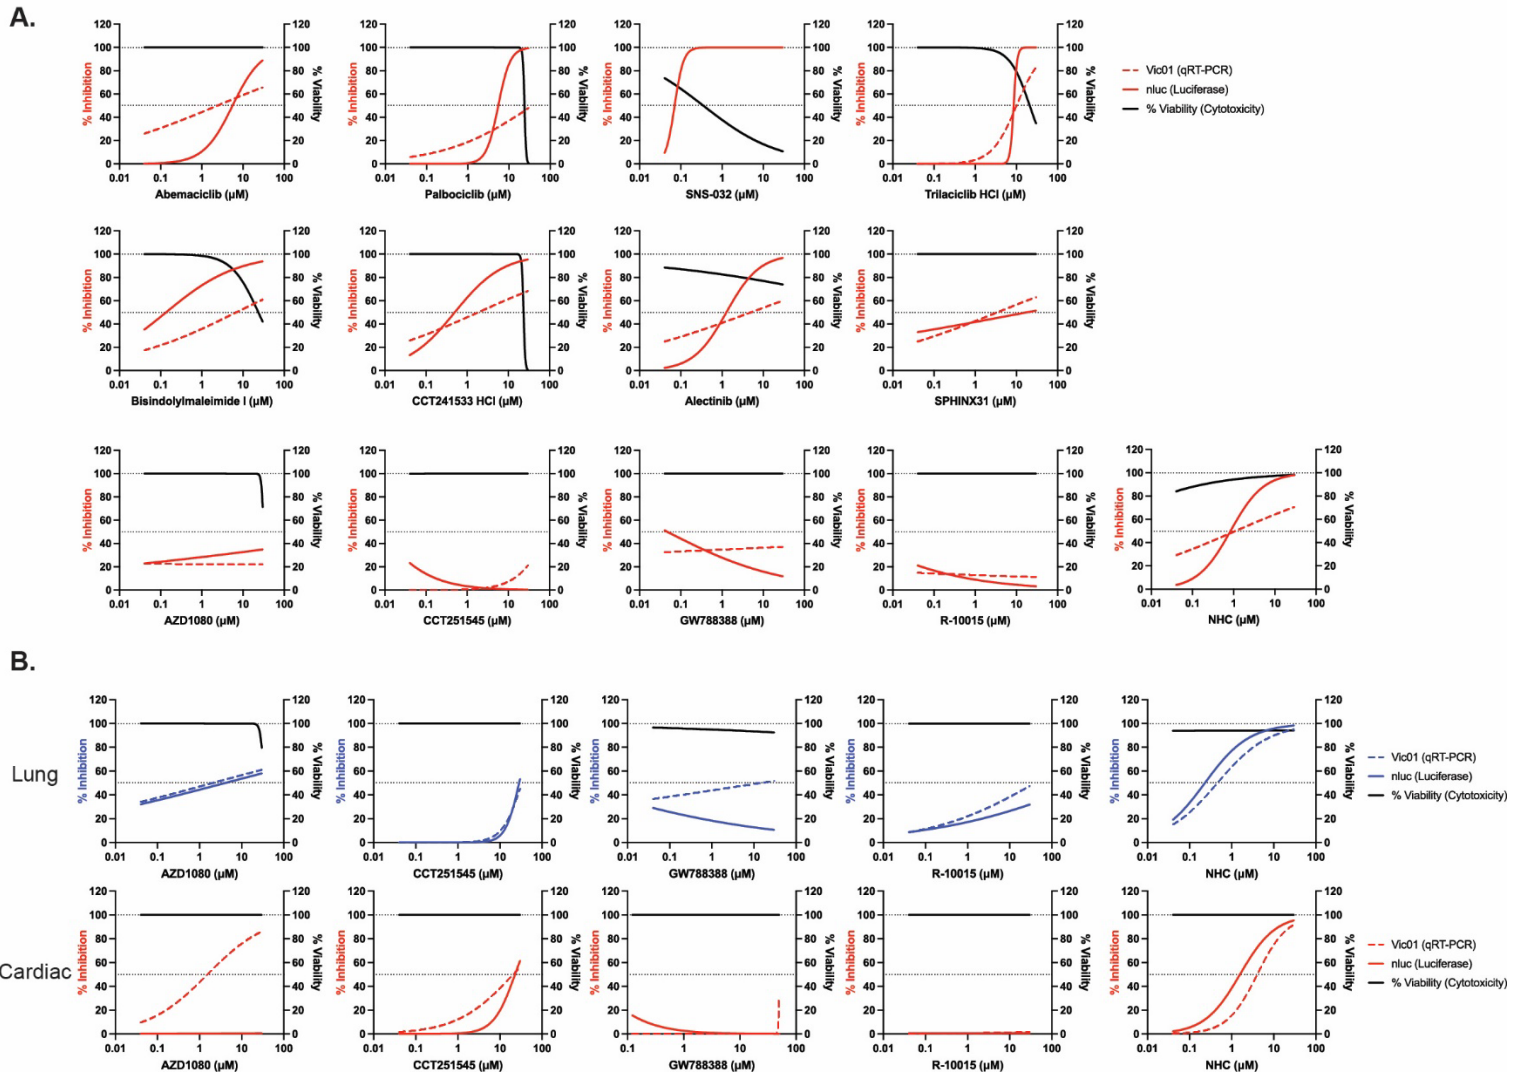

Source: https://www.biorxiv.org/content/10.1101/2022.09.20.508614.full.pdf
